# Supplementary material for: A multiscale graph neural network for predicting the properties of high-density cycloalkane-based diesel and jet range biofuels
Source: Royal Society of Chemistry journal article supplement (doi:10.1039/d4gc02621g), 2024-01-01
Supplement: d4gc02621g2.xlsx [file d4gc02621g2.xlsx]

## Sheet: Sheet1
	Compound	Carbon Number	Compound	Banching Index	Ring number	Density/g/cm3	Boiling Point/K	Flash Point/K	Viscosity/mPa·s	NHOC/MJ/kg	VNHOC/MJ/L	Cetane Number	Melting Point/K	Composite Index	Shape-P	Shape-Y	Shape-X
1	C6H12	6	cyclohexane	-0.01433	1	0.775074	340.018	246.326	0.86053	47.4727	36.7949	17.1652	168.5	3	0	0	0
2	C6H14	6	hexane	-4e-05	0	0.678747	329.615	246.453	0.27667	49.0242	33.2751	52.5292	156.88	2.5	0.33333	0	0
3	C6H14	6	2-methylpentane	0.02399	0	0.663555	334.134	243.927	0.26335	49.0334	32.5364	47.477	141.88	2.5	0.5	0.16667	0
4	C8H18	8	octane	-3e-05	0	0.727516	387.841	289.856	0.48994	48.6444	35.3896	74.1693	179.42	3.5	0.25	0	0
5	C8H18	8	3,3-dimethylhexane	0.03658	0	0.7098	387.841	291.158	0.4861	48.8218	34.6537	67.0026	181.84	3.5	0.5	0	0.125
6	C9H18	9	1-methyl-2-propylcyclopentane	0.00794	1	0.807489	417.094	315.646	1.1583	47.7679	38.5721	18.5866	197.35	4.5	0.22222	0.22222	0
7	C9H18	9	1-methyl-1-propylcyclopentane	0.01625	1	0.806243	417.094	317.659	0.8389	47.6937	38.4527	14.8357	225.49	4.5	0.22222	0	0.11111
8	C9H18	9	1,1,3-trimethylcyclohexane	0.03478	1	0.803216	417.094	316.961	0.54618	47.5761	38.2139	20.0423	217.73	4.5	0.33333	0.11111	0.11111
9	C9H20	9	nonane	-2e-05	0	0.742891	412.141	309.018	0.64656	48.5173	36.0431	82.4162	190.69	4	0.22222	0	0
10	C9H20	9	4-methyloctane	0.01177	0	0.738636	412.141	308.913	0.56505	48.5614	35.8692	76.3034	175.69	4	0.33333	0.11111	0
11	C9H20	9	3-methyloctane	0.01177	0	0.738568	412.141	308.857	0.5852	48.5564	35.8622	88.9156	175.69	4	0.33333	0.11111	0
12	C9H20	9	3,4-dimethylheptane	0.0217	0	0.733551	412.141	308.927	0.5768	48.6741	35.705	84.1432	160.69	4	0.44444	0.22222	0
13	C9H20	9	2,6-dimethylheptane	0.03201	0	0.733211	412.141	306.58	0.60947	48.5269	35.5805	93.8606	160.69	4	0.44444	0.22222	0
14	C9H20	9	4,4-dimethylheptane	0.03252	0	0.731001	412.141	311.427	0.55804	48.6791	35.5844	72.8751	193.11	4	0.44444	0	0.11111
15	C9H20	9	2,3,4-trimethylhexane	0.03584	0	0.727459	412.145	307.974	0.52198	48.7012	35.4282	100.403	145.69	4	0.55556	0.33333	0
16	C10H18	10	1,1'-bi(cyclopentane)	-0.00523	2	0.876041	445.128	338.717	1.8821	46.854	41.046	10.6722	223.76	5.5	0	0.2	0
17	C10H20	10	1-methyl-1-propylcyclohexane	0.01462	1	0.815148	439.842	338.541	1.3239	47.5432	38.7548	30.0531	233.24	5	0.2	0	0.1
18	C10H22	10	4-methylnonane	0.01059	0	0.751387	435.098	327.7	0.73148	48.4535	36.4073	85.3199	186.96	4.5	0.3	0.1	0
19	C10H22	10	2-methylnonane	0.0144	0	0.751104	435.098	326.204	0.77939	48.4187	36.3675	82.8048	186.96	4.5	0.3	0.1	0
20	C11H20	11	1-methyl-1,1'-bi(cyclopentane)	0.02019	2	0.879709	466.501	359.144	2.5711	46.9539	41.3057	8.60147	258.93	5.5	0.1	0	0
21	C11H22	11	pentylcyclohexane	-0.00162	1	0.82281	461.486	351.97	4.7776	47.4696	39.0585	47.3467	220.61	5.5	0.09091	0.09091	0
22	C11H22	11	1-methyl-1-propylcycloheptane	0.01329	1	0.82201	461.486	358.839	2.0018	47.7642	39.2627	29.3446	240.99	5.5	0.18182	0	0.09091
23	C11H22	11	1-methyl-2-pentylcyclopentane	0.0065	1	0.821884	461.486	351.493	2.5392	47.7139	39.2153	40.7342	219.89	5.5	0.18182	0.18182	0
24	C11H22	11	tert-pentylcyclohexane	0.02256	1	0.820662	461.486	358.196	0.073079	47.6231	39.0825	28.6853	223.03	5.5	0.27273	0.09091	0.09091
25	C11H22	11	1,1,3-trimethyl-4-propylcyclopentane	0.03312	1	0.818849	461.486	351.616	1.0034	47.5871	38.9666	30.4066	239.55	5.5	0.36364	0.18182	0.09091
26	C11H24	11	2-methyldecane	0.01309	0	0.76028	456.939	342.695	0.97594	48.3351	36.7482	102.648	198.23	5	0.27273	0.09091	0
27	C12H22	12	1,1'-bi(cyclohexane)	-0.00436	2	0.88363	486.956	377.988	3.2638	46.051	40.6921	52.5658	239.26	6.5	0	0.16667	0
28	C12H22	12	1-cyclopentyl-1-methylcyclohexane	0.00848	2	0.883516	486.956	376.73	3.7312	46.899	41.436	227.758	266.68	6.5	0.08333	0.08333	0.08333
29	C12H22	12	(1-methylcyclopentyl)cyclohexane	0.00848	2	0.883468	486.956	375.447	3.7312	46.8549	41.3948	11.7524	266.68	6.5	0.08333	0.08333	0.08333
30	C12H24	12	1-methyl-2-(4-methylpentyl)cyclopentane	0.01797	1	0.825757	482.159	366.407	4.735	47.7	39.3886	48.5287	216.16	6	0.25	0.25	0
31	C12H26	12	4-propylnonane	0.00566	0	0.768026	477.802	363.36	1.123	48.3621	37.1434	98.8379	209.5	5.5	0.25	0.08333	0
32	C12H26	12	dodecane	-2e-05	0	0.767941	477.802	358.586	1.3614	48.2605	37.0612	106.365	224.5	5.5	0.16667	0	0
33	C12H26	12	2,4,8-trimethylnonane	0.03286	0	0.764179	477.802	359.325	1.2245	48.3475	36.9462	118.492	179.5	5.5	0.41667	0.25	0
34	C13H24	13	1-cyclopentyl-1-methylcycloheptane	0.00783	2	0.886662	506.587	396.735	5.2313	47.1368	41.7944	13.4207	274.43	7	0.07692	0.07692	0.07692
35	C13H24	13	(1-methylcyclopentyl)cycloheptane	0.00783	2	0.886594	506.587	396.364	5.2313	47.2522	41.8935	16.3172	274.43	7	0.07692	0.07692	0.07692
36	C13H24	13	1-methyl-1,1'-bi(cyclohexane)	0.01682	2	0.886492	506.587	396.02	5.2313	46.866	41.5463	36.3573	274.43	6.5	0.08333	0	0
37	C13H24	13	dicyclohexylmethane	-0.00273	2	0.885794	506.587	462.142	0.87917	46.7841	41.441	43.7579	250.53	7	0	0.15385	0
38	C13H28	13	5-propyldecane	0.00523	0	0.773042	497.806	378.341	1.3605	48.2942	37.3334	93.4373	220.77	6	0.23077	0.07692	0
39	C13H28	13	6,6-dimethylundecane	0.02251	0	0.771222	497.806	379.498	0.79834	48.2574	37.2172	99.9977	238.19	6	0.30769	0	0.07692
40	C14H26	14	(1-methylcyclohexyl)cycloheptane	0.00727	2	0.890667	525.513	413.729	7.097	47.1972	42.037	23.8128	288.5	7.5	0.07143	0.07143	0.07143
41	C14H26	14	1-cyclohexyl-1-methylcycloheptane	0.00727	2	0.889001	525.513	412.895	7.097	47.0814	41.8554	15.9668	282.18	7.5	0.07143	0.07143	0.07143
42	C14H26	14	3-methyl-3-propyl-1,1'-bi(cyclopentane)	0.00871	2	0.88827	525.513	405.082	2.1261	47.1159	41.8516	18.9056	288.5	7.5	0.14286	0.28571	0
43	C14H28	14	1,1,5-trimethyl-2-pentylcyclohexane	0.02531	1	0.832808	521.114	401.674	2.1109	47.6019	39.6432	62.479	269.84	7	0.28571	0.14286	0.07143
44	C14H30	14	6-propylundecane	0.00485	0	0.776499	517.038	392.232	1.6237	48.2363	37.4554	103.967	232.04	6.5	0.21429	0.07143	0
45	C15H26	15	1,1':3',1''-tercyclopentane	-0.00124	3	0.943324	548.371	420.344	3.5846	46.5185	43.882	21.5471	286.77	8.5	0	0.26667	0
46	C15H28	15	1-methyl-1,1'-bi(cycloheptane)	0.00678	2	0.890959	543.793	431.078	9.3379	47.3935	42.2257	11.0479	289.93	8	0.06667	0.06667	0.06667
47	C15H28	15	2-propyl-1,1'-bi(cyclohexane)	-7e-05	2	0.890483	543.793	424.778	4.2416	47.0618	41.9077	19.3965	268.83	8	0.06667	0.2	0
48	C15H30	15	2-hexyl-1,1,5-trimethylcyclohexane	0.02362	1	0.834763	539.54	414.197	2.7384	47.5932	39.7291	64.8546	281.11	7.5	0.26667	0.13333	0.06667
49	C15H30	15	1,3-dipentylcyclopentane	0.00335	1	0.83334	539.54	407.209	4.3114	47.6257	39.6884	64.3914	264.97	7.5	0.13333	0.13333	0
50	C15H32	15	6-methyl-6-propylundecane	0.01547	0	0.779245	535.604	391.147	3.9652	48.2527	37.6007	100.365	260.73	7	0.26667	0	0.06667
51	C15H32	15	6-butylundecane	0.00453	0	0.778999	535.604	405.15	1.9128	48.1872	37.5378	106.713	243.31	7	0.2	0.06667	0
52	C15H32	15	2,4,8-trimethyl-6-propylnonane	0.03083	0	0.778923	535.604	407.594	2.6672	48.3128	37.632	125.235	198.31	7	0.4	0.26667	0
53	C15H32	15	pentadecane	-1e-05	0	0.775912	535.604	394.196	2.4754	48.1057	37.3257	116.018	258.31	7	0.13333	0	0
54	C16H28	16	3-(cyclopentylmethyl)-1,1'-bi(cyclopentane)	-0.00011	3	0.943574	565.877	432.78	19.8713	46.6099	43.9798	22.5411	298.04	9	0	0.25	0
55	C16H30	16	3-methyl-3-propyl-1,1'-bi(cyclohexane)	0.00762	2	0.891725	561.475	438.768	3.4029	47.0409	41.9475	14.9693	304	8.5	0.125	0.25	0
56	C16H32	16	1,1-dipentylcyclohexane	0.00535	1	0.836551	557.379	431.417	1.7111	47.6045	39.8236	49.5031	300.86	8	0.125	0	0.0625
57	C16H32	16	1,3-dipentylcyclohexane	0.00314	1	0.835009	557.379	421.48	5.7682	47.5121	39.673	58.2626	272.72	8	0.125	0.125	0
58	C16H34	16	6-pentylundecane	0.00425	0	0.780445	553.558	416.717	2.2289	48.1424	37.5725	108.91	254.58	7.5	0.1875	0.0625	0
59	C17H30	17	3-cyclohexyl-3-methyl-1,1'-bi(cyclopentane)	0.00515	3	0.945917	582.895	447.937	5.8679	46.569	44.0504	17.7391	329.69	9.5	0.05882	0.29412	0
60	C17H30	17	3-(cyclohexylmethyl)-1,1'-bi(cyclopentane)	-0.00011	3	0.943916	582.883	445.555	25.9658	46.6342	44.0187	28.7624	305.79	9.5	0	0.23529	0
61	C17H34	17	1,3-dihexylcyclopentane	0.00296	1	0.833644	574.672	426.031	5.7682	47.6082	39.6883	70.1249	287.51	8.5	0.11765	0.11765	0
62	C18H32	18	3-cyclopentyl-3-methyl-1,1'-bi(cyclohexane)	0.00486	3	0.946779	599.419	467.982	7.257	46.5693	44.0909	6.49098	337.44	10	0.05556	0.27778	0
63	C18H32	18	3-cycloheptyl-3-methyl-1,1'-bi(cyclopentane)	0.00486	3	0.946438	599.419	466.438	7.257	46.8424	44.3334	5.58833	337.44	10	0.05556	0.27778	0
64	C18H34	18	2,3',3',4,4,5'-hexamethyl-1,1'-bi(cyclohexane)	0.0278	2	0.894903	595.317	481.562	1.382	47.0209	42.0792	33.0516	337.72	9.5	0.33333	0.44444	0
65	C18H34	18	3-methyl-3-propyl-1,1'-bi(cycloheptane)	0.00678	2	0.893828	595.317	468.084	5.205	47.4107	42.3771	17.644	319.5	9.5	0.11111	0.22222	0
66	C18H36	18	1,3-dihexylcyclohexane	0.00279	1	0.834295	591.457	438.126	6.1286	47.5083	39.636	63.6144	295.26	9	0.11111	0.11111	0
67	C18H38	18	6-propylpentadecane	0.00377	0	0.779233	587.839	429.47	2.9517	47.6946	37.1652	111.067	277.12	8.5	0.16667	0.05556	0
68	C18H38	18	6-ethylhexadecane	0.00377	0	0.778043	587.839	425.753	2.9517	48.0709	37.4013	116.442	277.12	8.5	0.16667	0.05556	0
69	C18H38	18	7-methylheptadecane	0.00589	0	0.776683	587.839	420.677	2.9517	47.8342	37.152	113.929	277.12	8.5	0.16667	0.05556	0
70	C19H34	19	1'-methyl-1,1':3',1''-tercyclohexane	0.00713	3	0.946776	615.52	481.022	8.8526	46.5587	44.0807	-5.57816	345.19	10.5	0.05263	0.15789	0.05263
71	C20H34	20	1,1':2',1'':3'',1'''-quatercyclopentane	-9e-05	4	0.998451	635.309	481.562	10.4726	46.3605	46.2886	21.2219	349.78	11.5	0	0.3	0
72	C20H36	20	3-cyclopentyl-3-methyl-1,1'-bi(cycloheptane)	0.00438	3	0.947455	631.221	493.964	10.6537	47.0315	44.5603	-11.5385	352.94	11	0.05	0.25	0
73	C20H36	20	3-cycloheptyl-3-methyl-1,1'-bi(cyclohexane)	0.00438	3	0.946639	631.221	493.096	10.6537	46.8128	44.3148	-6.27333	352.94	11	0.05	0.25	0
74	C21H38	21	3-cyclohexyl-3-methyl-1,1'-bi(cycloheptane)	0.00417	3	0.946819	646.538	502.406	12.6512	46.941	44.4446	-6.72538	360.69	11.5	0.04762	0.2381	0
75	C22H40	22	1'-methyl-1,1':3',1''-tercycloheptane	0.00616	3	0.946063	661.189	512.937	14.8272	47.1609	44.6172	-18.0952	368.44	12	0.04545	0.13636	0.04545
