# Supplementary material for: A multiscale graph neural network for predicting the properties of high-density cycloalkane-based diesel and jet range biofuels
Source: Royal Society of Chemistry journal article supplement (doi:10.1039/d4gc02621g), 2024-01-01
Supplement: d4gc02621g3.xlsx [file d4gc02621g3.xlsx]

## Sheet: Sheet2
Name	CAS	Formula	C	H	M	Tb	FP	Viscosity, mPa*s	Density (g/cm3)	LHV (kJ/mol)LHV (kJ/mol)	Absolute value of LHV	VNHOC(MJ/L)	CN
Propane	74-98-6	C3H8	3	8	40	-42.11	-104	-	0.493	-2043.1	2043.1	25.1812	-20
3,3-dimethylpentane	562-49-2	C7H16	7	16	88	86	-19	-	0.6936	-4456.3	4456.3	35.1237	-10.3
2,6-dimethylnaphthalene	581-42-0	C12H12	12	12	148	253	108	-	1.003	-6167.6	6167.6	41.798	-7
1,3-diisopropylbenzene	99-62-7	C12H18	12	18	148	203	77.67	-	0.8559	-6770	6770	39.1516	-7
(1,1-dimethylethyl)-benzene	98-06-6	C10H14	10	14	124	169.1	60	-	0.8665	-5557.1	5557.1	38.8325	-1
Methane	74-82-8	C1H4	1	4	16	-161.5	-188	-	-	-802.62	802.62	-	0
Ethane	74-84-0	C2H6	2	6	28	-88.6	-135	-	-	-1428.6	1428.6	-	0
Vinylacetylene	689-97-4	C4H4	4	4	52	6	-	-	-	-2340.27	2340.27	-	0
2,3-Hexadiene	592-49-4	C6H10	6	10	76	-	-	-	-	-3130.86	3130.86	-	0
methylcyclopentadiene dimer	26472-00-4	C12H16	12	16	148	-	27	-	-	-3400	3400	-	0
2-Methyl-2,4-Hexadiene	28823-41-8	C7H12	7	12	88	-	-	-	-	-3500.77	3500.77	-	0
3-methylpenta-1,2-diene	7417-48-3	C6H10	6	10	76	-	-	-	-	-3678.69	3678.69	-	0
3-Ethylcyclopentene	694-35-9	C7H12	7	12	88	-	-	-	-	-4156.41	4156.41	-	0
trans-3-Methyl-2-hexene	20710-38-7	C7H14	7	14	88	-	-	-	-	-4367.27	4367.27	-	0
1-n-Propylcyclopentene	3074-61-1	C8H14	8	14	100	-	-	-	-	-4757.4	4757.4	-	0
cyclooctene	931-88-4	C8H14	8	14	100	-	25	-	-	-4772	4772	-	0
2,6-Octadiene	4974-27-0	C8H14	8	14	100	-	-	-	-	-4860.44	4860.44	-	0
1,1-Dimethylcyclopentane	1638-26-2	C7H14	7	14	88	87.8	-16	-	-	-4917.25	4917.25	-	0
cis-1,3-Dimethylcyclopentane	2532-58-3	C7H14	7	14	88	91.7	-14	-	-	-4917.25	4917.25	-	0
trans-1,3-Dimethylcyclopentane	1759-58-6	C7H14	7	14	88	90.7	-13	-	-	-4917.25	4917.25	-	0
1,4-cyclohexadiene	628-41-1	C6H8	6	8	76	89.5	-11	-	-	-4917.25	4917.25	-	0
cis-1,2-Dimethylcyclopentane	1192-18-3	C7H14	7	14	88	99.5	-4	-	-	-4925.86	4925.86	-	0
4-Methyl-1-Heptene	13151-05-8	C8H16	8	16	100	-	2	-	-	-4956	4956	-	0
3-Ethyl-1-Hexene	3404-58-8	C8H16	8	16	100	-	1	-	-	-4958	4958	-	0
2-Heptene, 6-methyl-, trans	0	C8H16	8	16	100	-	-	-	-	-4973.89	4973.89	-	0
4-Ethyl-1-Hexene	16746-85-3	C8H16	8	16	100	-	-	-	-	-4991.11	4991.11	-	0
3-Methyl-1-Heptene	4810-09-7	C8H16	8	16	100	-	-	-	-	-4992.16	4992.16	-	0
Naphthalene, 1,2,3,4-tetrahydro-6-propyl	42775-77-9	C13H18	13	18	160	-	-	-	-	-5033.83	5033.83	-	0
Indan, 4-methyl	824-22-6	C10H12	10	12	124	-	-	-	-	-5392.89	5392.89	-	0
Indan, 5-methyl	874-35-1	C10H12	10	12	124	-	-	-	-	-5393.19	5393.19	-	0
Indan, 2-methyl	824-63-5	C10H12	10	12	124	-	-	-	-	-5399.65	5399.65	-	0
trans-3-Methyl-3-heptene	0	C8H16	8	16	100	-	-	-	-	-5417.15	5417.15	-	0
1-methyl-4-(1-propenyl)benzene		C10H12	10	12	124	-	-	-	-	-5468.22	5468.22	-	0
trans-1-Methyl-3-ethylcyclopentane	2613-65-2	C8H16	8	16	100	121	-	-	-	-5529.43	5529.43	-	0
dicyclopentadiene	77-73-6	C10H12	10	12	124	-	32.22	-	-	-5535	5535	-	0
3,3,4-Trimethylheptane	20278-87-9	C10H22	10	22	124	-	-	-	-	-6291.23	6291.23	-	0
2,2-dimethyl-1,2,3,4-tetrahydronaphthalene	13556-55-3	C12H16	12	16	148	-	-	-	-	-6405.22	6405.22	-	0
Naphthalene, 1,2,3,4-tetrahydro-6,7-dimethyl	1076-61-5	C12H16	12	16	148	-	-	-	-	-6610.24	6610.24	-	0
Naphthalene, 1,2,3,4-tetrahydro-2,6-dimethyl	7524-63-2	C12H16	12	16	148	-	-	-	-	-6613.97	6613.97	-	0
Naphthalene, 1-ethyl-1,2,3,4-tetrahydro	13556-58-6	C12H16	12	16	148	-	-	-	-	-6629.62	6629.62	-	0
Naphthalene, 1,2,3,4-tetrahydro-1-propyl	66324-83-2	C13H18	13	18	160	-	-	-	-	-6817.59	6817.59	-	0
Naphthalene, 2-propyl	2027-19-2	C13H14	13	14	160	-	-	-	-	-7114.56	7114.56	-	0
4-ethylbiphenyl	5707-44-8	C14H14	14	14	172	-	-	-	-	-7328.17	7328.17	-	0
1,2-Diphenylpropane	5814-85-7	C15H16	15	16	184	-	-	-	-	-7954.83	7954.83	-	0
Naphthalene, 2-hexyl	2876-46-2	C16H20	16	20	196	-	-	-	-	-8648	8648	-	0
1-heptylnaphthalene	2876-52-0	C17H22	17	22	208	-	-	-	-	-8648	8648	-	0
1-octylnaphthalene	2876-51-9	C18H24	18	24	220	-	-	-	-	-8648	8648	-	0
2-nonylnaphthalene	61886-67-7	C19H26	19	26	232	-	-	-	-	-8648	8648	-	0
1-heptyl-1,2,3,4-tetrahydronaphthalene	0	C17H26	17	26	208	-	-	-	-	-9702.77	9702.77	-	0
1-Octyl-1,2,3,4-tetrahydronaphthalene	29138-91-8	C18H28	18	28	220	-	-	-	-	-10317.5	10317.5	-	0
Naphthalene, 1,2,3,4-tetrahydro-1-nonyl	33425-49-9	C19H30	19	30	232	-	-	-	-	-10932	10932	-	0
Naphthalene, 1-decyl-1,2,3,4-tetrahydro	55255-57-7	C20H32	20	32	244	-	-	-	-	-11546.6	11546.6	-	0
n-Hexacosane	630-01-3	C26H54	26	54	316	415	202	-	-	-16000	16000	-	0
n-Heptacosane	593-49-7	C27H56	27	56	328	442	202	-	-	-16600	16600	-	0
9,10-dihydroanthracene	613-31-0	C14H12	14	12	172	305	-	-	1.215	-	-	-	0
4-benzyl-biphenyl	613-42-3	C19H16	19	16	232	285	-	-	1.171	-	-	-	0
9,10-dihydrophenanthrene	776-35-2	C14H12	14	12	172	168	-	-	1.0757	-	-	-	0
1,1-diphenylethylene	530-48-3	C14H12	14	12	172	277	-	-	1.0232	-	-	-	0
1,3-dimethylnaphthalene	575-41-7	C12H12	12	12	148	265	-	-	1.0144	-	-	-	0
cis 1,2-diphenylethylene	645-49-8	C14H12	14	12	172	141	121	-	1.0143	-	-	-	0
1,3-diphenylpropane	1081-75-0	C15H16	15	16	184	-	-	-	1.007	-	-	-	0
2,3-dimethylnaphthalene	581-40-8	C12H12	12	12	148	267	-	-	1.003	-	-	-	0
3,3Í-dimethylbiphenyl	612-75-9	C14H14	14	14	172	289.6	-	-	0.9995	-	-	-	0
2,2-diphenylpropane	778-22-3	C15H16	15	16	184	281	110	-	0.998	-	-	-	0
1,2-dihydronaphthalene	447-53-0	C10H10	10	10	124	210.2	-	-	0.9974	-	-	-	0
1-cyclohexen-1-ylbenzene	771-98-2	C12H14	12	14	148	268	-	-	0.9939	-	-	-	0
2,2Í-dimethylbiphenyl	605-39-0	C14H14	14	14	172	258	-	-	0.9906	-	-	-	0
2-methylindene	2177-47-1	C10H10	10	10	124	209	71	-	0.974	-	-	-	0
trans 1,2-diphenylethylene	103-30-0	C14H12	14	12	172	307	145	-	0.9707	-	-	-	0
1,2,4-trimethylcyclohexane	2234-75-5	C9H18	9	18	112	-	-	-	0.944	-	-	-	0
(1-propynyl)-benzene	673-32-5	C9H8	9	8	112	186	-	-	0.942	-	-	-	0
1,5-dimethyltetralin	21564-91-0	C12H16	12	16	148	239	-	-	0.941	-	-	-	0
cyclopropylbenzene	873-49-4	C9H10	9	10	112	172	-	-	0.9317	-	-	-	0
(3-butynyl)-benzene	16520-62-0	C10H10	10	10	124	177	-	-	0.9258	-	-	-	0
(1-methylethenyl)-benzene	98-83-9	C9H10	9	10	112	165.4	54	-	0.9106	-	-	-	0
(2-methyl-1-propenyl)-benzene	768-49-0	C10H12	10	12	124	189	-	-	0.9	-	-	-	0
(3-butenyl)-benzene	768-56-9	C10H12	10	12	124	183	-	-	0.8831	-	-	-	0
1,2-diethylbenzene	135-01-3	C10H14	10	14	124	183.4	57.222	-	0.88	-	-	-	0
1,4-diethylbenzene	105-05-5	C10H14	10	14	124	184	56	-	0.862	-	-	-	0
4-tert-butylbenzene	98-51-1	C11H16	11	16	136	193	68	-	0.8612	-	-	-	0
beta-Pinene	127-91-3	C10H16	10	16	124	165.8	31	-	0.86	-	-	-	0
1,3,5-trimethylcyclohexane	1839-63-0	C9H18	9	18	112	-	-	-	0.86	-	-	-	0
(2,2-dimethylpropyl)-benzene	1007-26-7	C11H16	11	16	136	186	-	-	0.8581	-	-	-	0
(3-methylbutyl)-benzene	2049-94-7	C11H16	11	16	136	196	-	-	0.856	-	-	-	0
alpha-Pinene	80-56-8	C10H16	10	16	124	156.3	30	-	0.8539	-	-	-	0
1-Ethyl-1-methylcyclohexane	4926-90-3	C9H18	9	18	112	-	-	-	0.8539	-	-	-	0
1-Ethyl-2-methylcyclohexane	3728-54-9	C9H18	9	18	112	-	-	-	0.8538	-	-	-	0
1-Ethyl-3-methylcyclohexane	3728-55-0	C9H18	9	18	112	-	-	-	0.849	-	-	-	0
1-Ethyl-4-methylcyclohexane	3728-56-1	C9H18	9	18	112	-	-	-	0.8411	-	-	-	0
1-methyl-1-cyclohexene	591-49-1	C7H12	7	12	88	110.3	-	-	0.8102	-	-	-	0
Ethylcycloheptane	13151-55-8	C9H18	9	18	112	-	-	-	0.7963	-	-	-	0
tetrahydro dicyclopentadiene	2825-82-3	C10H16	10	16	124	-	-	-	0.7749	-	-	-	0
2,3,4-trimethyl-2-pentene	565-77-5	C8H16	8	16	100	116	-	-	0.7434	-	-	-	0
3-Heptyne	2586-89-2	C7H12	7	12	88	109.2	-	-	0.7336	-	-	-	0
3-Ethyl-2-methyl-1-pentene	19780-66-6	C8H16	8	16	100	109.2	-	-	0.7262	-	-	-	0
2,3-dimethylheptane	3074-71-3	C9H20	9	20	112	140.6	-	-	0.726	-	-	-	0
3-Ethyl-2-pentene	816-79-5	C7H14	7	14	88	95	-	-	0.7204	-	-	-	0
2-methyl-2-heptene	627-97-4	C8H16	8	16	100	122	-	-	0.72	-	-	-	0
2,5-Dimethyl-2-Hexene	3404-78-2	C8H16	8	16	100	113	-	-	0.7182	-	-	-	0
3-Methyl-3-hexene	3899-36-3	C7H14	7	14	88	94	-	-	0.705	-	-	-	0
3-carene	13466-78-9	C10H16	10	16	124	-	-	-	0.6897	-	-	-	0
2-Methyl-3-hexene	692-24-0	C7H14	7	14	88	88	-	-	0.6853	-	-	-	0
4,4-dimethyl-1-pentene	762-62-9	C7H14	7	14	88	72.5	-	-	0.6827	-	-	-	0
n-Undecylcyclopentane	6785-23-5	C16H32	16	32	196	-	-	4.28	-	-	-	-	0
n-Dodecylcyclopentane	5634-30-0	C17H34	17	34	208	-	-	5.1	-	-	-	-	0
Tridecylcyclopentane	6006-34-4	C18H36	18	36	220	-	-	6.04	-	-	-	-	0
Cyclohexane, undecyl	54105-66-7	C17H34	17	34	208	-	-	6.32	-	-	-	-	0
n-Tetradecylcyclopentane	1795-22-8	C19H38	19	38	232	-	-	7.11	-	-	-	-	0
1,2,3,4-TETRAMETHYLCYCLOHEXANE	3726-45-2	C10H20	10	20	124	-	46	-	-	-	-	-	0
4,4-Dimethyl-2-pentene	690-08-4	C7H14	7	14	88	76.7	-	-	-	-	-	-	0
3,4-Dimethyl-2-pentene	4914-92-5	C7H14	7	14	88	91	-	-	-	-	-	-	0
4,4Í-dimethylbibenzyl	538-39-6	C16H18	16	18	196	178	-	-	-	-	-	-	0
9-methylanthracene	779-02-2	C15H12	15	12	184	196	-	-	-	-	-	-	0
2-Methylundecane	7045-71-8	C12H26	12	26	148	211	-	-	-	-	-	-	0
azulene	275-51-4	C10H8	10	8	124	249	-	-	-	-	-	-	0
1,5-dimethylnaphthalene	571-61-9	C12H12	12	12	148	267	-	-	-	-	-	-	0
4-Methylundecane	2980-69-0	C12H26	12	26	148	-	-	-	-	-	-	-	0
4-Methyltridecane	26730-12-1	C14H30	14	30	172	-	-	-	-	-	-	-	0
2-Methylhexadecane	1560-92-5	C17H36	17	36	208	-	-	-	-	-	-	-	0
5-Butylhexadecane	6912-07-8	C20H42	20	42	244	-	-	-	-	-	-	-	0
2,6,10,14-TETRAMETHYLHEXADECANE	638-36-8	C20H42	20	42	244	-	-	-	-	-	-	-	0
aphthalene, decahydro	91-17-8	C10H18	10	18	124	-	-	-	-	-	-	-	0
1-Methyl-2-propylcyclohexane	4291-79-6	C10H20	10	20	124	-	-	-	-	-	-	-	0
1-Methyl-3-propylcyclohexane	4291-80-9	C10H20	10	20	124	-	-	-	-	-	-	-	0
1-Methyl-4-propylcyclohexane	4291-81-0	C10H20	10	20	124	-	-	-	-	-	-	-	0
1-Methyl-4-Isopropylcyclohexane	99-82-1	C10H20	10	20	124	-	-	-	-	-	-	-	0
trans-1,4-DIETHYLCYCLOHEXANE	1679-00-1	C10H20	10	20	124	-	-	-	-	-	-	-	0
1,2,3,5-Tetramethylcyclohexane	3726-36-1	C10H20	10	20	124	-	-	-	-	-	-	-	0
1,1,3,5-Tetramethylcyclohexane	4306-65-4	C10H20	10	20	124	-	-	-	-	-	-	-	0
1-iso-Propyl-4-methylcyclohexane	6069-98-3	C10H20	10	20	124	-	-	-	-	-	-	-	0
1,1,4,4-Tetramethylcyclohexane	2223-52-1	C10H20	10	20	124	-	-	-	-	-	-	-	0
1-Ethyl-3,5-dimethylcyclohexane	7045-68-3	C10H20	10	20	124	-	-	-	-	-	-	-	0
trans-4a-Methyl-decahydronaphthalene	2547-26-4	C11H20	11	20	136	-	-	-	-	-	-	-	0
2-Ethyladamantane	14451-87-7	C12H20	12	20	148	-	-	-	-	-	-	-	0
3-Hexanylcyclohexane	4456-99-9	C12H24	12	24	148	-	-	-	-	-	-	-	0
alpha-n-Propyldecalin	91972-45-1	C13H24	13	24	160	-	-	-	-	-	-	-	0
cyclotridecane	295-02-3	C13H26	13	26	160	-	-	-	-	-	-	-	0
1-butyladamantane	14449-41-3	C14H24	14	24	172	-	-	-	-	-	-	-	0
n-Butyldecalin	92369-80-7	C14H26	14	26	172	-	-	-	-	-	-	-	0
sec-Butyldecalin	92369-82-9	C14H26	14	26	172	-	-	-	-	-	-	-	0
tert-Butyldecalin	27193-30-2	C14H26	14	26	172	-	-	-	-	-	-	-	0
bisabolene	495-62-5	C15H24	15	24	184	-	-	-	-	-	-	-	0
1,1,4a,5,6-Pentamethyldecahydronaphthalene	80655-44-3	C15H28	15	28	184	-	-	-	-	-	-	-	0
trans-2-PENTADECENE	74392-36-2	C15H30	15	30	184	-	-	-	-	-	-	-	0
1,3,5-triisopropylcyclohexane	34387-60-5	C15H30	15	30	184	-	-	-	-	-	-	-	0
n-Octyldecalin	0	C18H36	18	36	220	-	-	-	-	-	-	-	0
2-Butene	107-01-7	C4H8	4	8	52	-	-	-	-	-	-	-	0
2-Pentene	109-68-2	C5H10	5	10	64	-	-	-	-	-	-	-	0
2-Hexene	592-43-8	C6H12	6	12	76	-	-	-	-	-	-	-	0
3-Hexene	592-47-2	C6H12	6	12	76	-	-	-	-	-	-	-	0
3-methyl-2-pentene	922-61-2	C6H12	6	12	76	-	-	-	-	-	-	-	0
2-heptene	592-77-8	C7H14	7	14	88	-	-	-	-	-	-	-	0
3-Heptene	592-78-9	C7H14	7	14	88	-	-	-	-	-	-	-	0
4-Methyl-2-hexene	3404-55-5	C7H14	7	14	88	-	-	-	-	-	-	-	0
3-Methyl-2-hexene	17618-77-8	C7H14	7	14	88	-	-	-	-	-	-	-	0
5-Methyl-2-hexene	3404-62-4	C7H14	7	14	88	-	-	-	-	-	-	-	0
4-Octene	592-99-4	C8H16	8	16	100	-	-	-	-	-	-	-	0
2-Methyl-3-heptene	692-96-6	C8H16	8	16	100	-	-	-	-	-	-	-	0
2,2-Dimethyl-3-Hexene	3123-93-1	C8H16	8	16	100	-	-	-	-	-	-	-	0
2,5-Dimethyl-3-Hexene	692-70-6	C8H16	8	16	100	-	-	-	-	-	-	-	0
3-Ethyl-2-methyl-2-pentene	19780-67-7	C8H16	8	16	100	-	-	-	-	-	-	-	0
3,4,4-Trimethyl-2-pentene	39761-57-4	C8H16	8	16	100	-	-	-	-	-	-	-	0
6-Methyl-2-heptene	73548-72-8	C8H16	8	16	100	-	-	-	-	-	-	-	0
6-Methyl-3-heptene	97002-55-6	C8H16	8	16	100	-	-	-	-	-	-	-	0
4,4-Diethyl-1-heptene	0	C11H22	11	22	136	-	-	-	-	-	-	-	0
3-methyl-1-cyclohexene	591-48-0	C7H12	7	12	88	-	-	-	-	-	-	-	0
1-tert-butyl-1-cyclohexene	3419-66-7	C10H18	10	18	124	-	-	-	-	-	-	-	0
(2-propynyl)-benzene	10147-11-2	C9H8	9	8	112	-	-	-	-	-	-	-	0
1-ethynyl-2-methylbenzene	766-47-2	C9H8	9	8	112	-	-	-	-	-	-	-	0
1-ethynyl-3-methylbenzene	766-82-5	C9H8	9	8	112	-	-	-	-	-	-	-	0
1-ethynyl-4-methylbenzene	766-97-2	C9H8	9	8	112	-	-	-	-	-	-	-	0
(1-propenyl)-benzene	637-50-3	C9H10	9	10	112	-	-	-	-	-	-	-	0
Propenylbenzene	637-50-3	C9H10	9	10	112	-	-	-	-	-	-	-	0
1-Phenyl-1-butyne	622-76-4	C10H10	10	10	124	-	-	-	-	-	-	-	0
1-ethynyl-4-ethylbenzene	40307-11-7	C10H10	10	10	124	-	-	-	-	-	-	-	0
1-ethynyl-2,5-dimethylbenzene	74331-70-7	C10H10	10	10	124	-	-	-	-	-	-	-	0
1-ethenyl-2,5-dimethylbenzene	2039-89-6	C10H12	10	12	124	-	-	-	-	-	-	-	0
Benzene, 1-methyl-4-(1-methylpropyl)-	1595-16-0	C11H16	11	16	136	-	-	-	-	-	-	-	0
2,3-Dimethyltetralin	21564-92-1	C12H16	12	16	148	-	-	-	-	-	-	-	0
1-Isobutyl-2,5-dimethylbenzene	55669-88-0	C12H18	12	18	148	-	-	-	-	-	-	-	0
1-methylfluorene	1730-37-6	C14H12	14	12	172	-	-	-	-	-	-	-	0
cyclopenta[def]phenanthrene	203-64-5	C15H10	15	10	184	-	-	-	-	-	-	-	0
2-phenylindene	4505-48-0	C15H12	15	12	184	-	-	-	-	-	-	-	0
dibenzosuberane	833-48-7	C15H14	15	14	184	-	-	-	-	-	-	-	0
trans 1,2-diphenylpropene	833-81-8	C15H14	15	14	184	-	-	-	-	-	-	-	0
4-propylbiphenyl	10289-45-9	C15H16	15	16	184	-	-	-	-	-	-	-	0
4-propylbiphenyl	10289-45-9	C15H16	15	16	184	-	-	-	-	-	-	-	0
1,1-diphenylpropane	1530-03-6	C15H16	15	16	184	-	-	-	-	-	-	-	0
4-butylbiphenyl	37909-95-8	C16H18	16	18	196	-	-	-	-	-	-	-	0
4-pentylbiphenyl	7116-96-3	C17H20	17	20	208	-	-	-	-	-	-	-	0
Cyclopropane	75-19-4	C3H6	3	6	40	-31	-94	-	0.77	-4860.3	4860.3	93.5608	0
Methylcyclopropane	594-11-6	C4H8	4	8	52	1	-	-	0.7809	-4863.9	4863.9	73.0427	0
Cyclobutane	287-23-0	C4H8	4	8	52	12.5	-64	-	0.776	-4864.4	4864.4	72.5918	0
cyclopentane	287-92-3	C5H10	5	10	64	49.2	-25	0.439	0.7963	-4870.8	4870.8	60.6034	0
Methylcyclobutane	598-61-8	C5H10	5	10	64	37	-	-	0.79	-4867	4867	60.077	0
cis-1,2-Dimethylcyclopropane	930-18-7	C5H10	5	10	64	37	-	-	0.788	-4870.5	4870.5	59.968	0
Ethylcyclopropane	1191-96-4	C5H10	5	10	64	36	-	-	0.7829	-4867	4867	59.5371	0
1,3-cyclohexadiene	592-57-4	C6H8	6	8	76	80.3	-16	-	0.8349	-4913.2	4913.2	53.9741	0
1,4-Diphenylbenzene (p-terphenyl)	92-94-4	C18H14	18	14	220	376	207	-	1.28	-8935	8935	51.9855	0
anthracene	120-12-7	C14H10	14	10	172	341.3	121	-	1.28	-6847.4	6847.4	50.9574	0
Chrysene	218-01-9	C18H12	18	12	220	448	237	-	1.274	-8679.6	8679.6	50.2628	0
methylcyclopentane	96-37-7	C6H12	6	12	76	71.8	-27	0.507	0.7765	-4894.4	4894.4	50.0066	0
Ethylcyclobutane	4806-61-5	C6H12	6	12	76	70	-15	-	0.7763	-4893.6	4893.6	49.9855	0
1,1,2-Trimethylcyclopropane	4127-45-1	C6H12	6	12	76	53	-	-	0.7767	-4889.2	4889.2	49.9663	0
acenaphthene	83-32-9	C12H10	12	10	148	277.5	120	-	1.222	-6001.4	6001.4	49.5521	0
pyrene	129-00-0	C16H10	16	10	196	394	199	-	1.271	-7630.9	7630.9	49.4841	0
1,3-diphenylbenzene	92-06-8	C18H14	18	14	220	375	191	-	1.199	-9053	9053	49.3389	0
fluoranthene	206-44-0	C16H10	16	10	196	380	184	-	1.252	-7695	7695	49.1538	0
hexamethylbenzene	87-85-4	C12H18	12	18	148	268	114	-	1.063	-6737.4	6737.4	48.3909	0
fluorene	86-73-7	C13H10	13	10	160	294	133	-	1.203	-6425.1	6425.1	48.3087	0
cyclohexane	110-82-7	C6H12	6	12	76	80.7	-20	0.98	0.7439	-4914.38	4914.38	48.1027	0
trans-1-Methyl-2-Ethylcyclopentane	930-90-5	C8H16	8	16	100	121	-	-	0.8463	-5535.59	5535.59	46.8477	0
1,3-Dimethylcyclopentane	2453-00-1	C7H14	7	14	88	-	-	-	0.883	-4660	4660	46.7589	0
1,2-diphenylbenzene	84-15-1	C18H14	18	14	220	337	163	-	1.12	-9053	9053	46.088	0
1,2-dimethylnaphthalene	573-98-8	C12H12	12	12	148	267	-	-	1.0179	-6487.98	6487.98	44.6224	0
1,4-dimethylnaphthalene	571-58-4	C12H12	12	12	148	264	-	-	1.0166	-6487.98	6487.98	44.5654	0
1-phenylnaphthalene	605-02-7	C16H12	16	12	196	334	162	-	1.096	-7920	7920	44.2873	0
cycloheptane	291-64-5	C7H14	7	14	88	118.8	-	-	0.7852	-4925.86	4925.86	43.9521	0
trans-1,4-Dimethylcyclohexane	2207-04-7	C8H16	8	16	100	119.3	11	-	0.8023	-5478	5478	43.95	0
biphenyl	92-52-4	C12H10	12	10	148	255.2	113	-	1.04	-6248	6248	43.9049	0
Naphthalene, 1-pentyl	86-89-5	C15H18	15	18	184	305	124	-	0.9656	-8343.9	8343.9	43.7873	0
1,1-dimethylcyclohexane	590-66-9	C8H16	8	16	100	119.5	3	-	0.7936	-5479.7	5479.7	43.4869	0
Naphthalene, 2-butyl	1134-62-9	C14H16	14	16	172	286	-	-	0.9673	-7729.15	7729.15	43.4675	0
trans-1,3-Dimethylcyclohexane	2207-03-6	C8H16	8	16	100	120.1	8	-	0.7846	-5503.7	5503.7	43.182	0
cis-1-Methyl-3-ethylcyclopentane	2613-66-3	C8H16	8	16	100	121	-	-	0.7769	-5529.43	5529.43	42.9581	0
ethylcyclopentane	1640-89-7	C7H14	7	14	88	103.5	-4	-	0.7649	-4925.86	4925.86	42.8158	0
3-methylbiphenyl	643-93-6	C13H12	13	12	160	274	-	-	1.0182	-6713.59	6713.59	42.7236	0
methylcyclohexane	108-87-2	C7H14	7	14	88	100.9	-6	0.734	0.7619	-4925.86	4925.86	42.6479	0
4-methylbiphenyl	644-08-6	C13H12	13	12	160	273	-	-	1.015	-6713.59	6713.59	42.5893	0
cis-1,2-Diphenylethene	645-49-8	C14H12	14	12	172	141	121	-	1.0143	-7197.04	7197.04	42.4416	0
2-methylbiphenyl	643-58-3	C13H12	13	12	160	258	137	-	1.0113	-6713.59	6713.59	42.4341	0
trans-1,2-Dimethylcyclopentane	822-50-4	C7H14	7	14	88	91.9	-10	-	0.7592	-4917.25	4917.25	42.4225	0
1-nonylnaphthalene	26438-26-6	C19H26	19	26	232	-	176	-	0.9371	-10500	10500	42.4119	0
1-decylnaphthalene	26438-27-7	C20H28	20	28	244	379	177	-	0.9322	-11100	11100	42.4075	0
1-Methyl-1,2,3,4-tetrahydronaphthalene	1559-81-5	C11H14	11	14	136	221	-	-	0.9583	-6014.88	6014.88	42.3828	0
1-methyl-1,4-cyclohexadiene	4313-57-9	C7H10	7	10	88	-	-	-	0.766	-4859.7	4859.7	42.3015	0
Naphthalene, 1-hexyl	2876-53-1	C16H20	16	20	196	322	152	-	0.9566	-8648	8648	42.2075	0
Naphthalene, 1-propyl	2765-18-6	C13H14	13	14	160	273	114	-	0.9897	-6819.9	6819.9	42.1853	0
1-hexyl-1,2,3,4-tetrahydronaphthalene	66325-11-9	C16H24	16	24	196	305	138	-	0.9176	-9010	9010	42.1815	0
1,1-Diphenylethane	612-00-0	C14H14	14	14	172	285.8	128.889	-	0.9997	-7250	7250	42.1385	0
1-ethylnaphthalene	1127-76-0	C12H12	12	12	148	258	111	-	1.0082	-6171	6171	42.0379	0
1-methylnaphthalene	90-12-0	C11H10	11	10	136	244.4	82	3.629	1.0202	-5595.8	5595.8	41.9767	0
cyclohexylbenzene	827-52-1	C12H16	12	16	148	239	99	-	0.9427	-6577.8	6577.8	41.8979	0
triphenylmethane	519-73-3	C19H16	19	16	232	359	176	-	1.014	-9582.8	9582.8	41.8834	0
2,2,3,3,-TetraMethylButane	594-82-1	C8H18	8	18	100	106.32	6	-	0.8242	-5063.9	5063.9	41.7367	0
2-ethylnaphthalene	939-27-5	C12H12	12	12	148	259	0.4	-	0.9922	-6206.8	6206.8	41.6107	0
1-Methylindene	767-59-9	C10H10	10	10	124	199	65	-	0.97	-5280	5280	41.3032	0
n-Hexadecylbenzene	1459-09-2	C22H38	22	38	268	385	193	-	0.8547	-12900	12900	41.1404	0
indene	95-13-6	C9H8	9	8	112	182	48.5	-	0.996	-4619.5	4619.5	41.0806	0
n-Pentadecylbenzene	2131-18-2	C21H36	21	36	256	373	183	8.99	0.8548	-12300	12300	41.0705	0
pentamethylbenzene	700-12-9	C11H16	11	16	136	232	93	-	0.917	-6074.9	6074.9	40.9609	0
n-Triacontane	638-68-6	C30H62	30	62	364	451	202	-	0.8097	-18400	18400	40.9299	0
2-Methylindene	2177-47-1	C10H10	10	10	124	209	71	-	0.974	-5210	5210	40.9237	0
n-tridecylbenzene	123-02-4	C19H32	19	32	232	340	165	6.48	0.855	-11100	11100	40.9073	0
n-Nonacosane	630-03-5	C29H60	29	60	352	443	202	-	0.8083	-17800	17800	40.8743	0
Indan, 1-methyl	767-58-8	C10H12	10	12	124	191	-	-	0.938	-5399.65	5399.65	40.8457	0
n-Octacosane	630-02-4	C28H58	28	58	340	432	202	-	0.8067	-17200	17200	40.8095	0
trans-1,2-Diphenylethene	103-30-0	C14H12	14	12	172	307	145	-	0.9707	-7201.24	7201.24	40.641	0
n-Pentacosane	629-99-2	C25H52	25	52	304	401.9	202	-	0.8012	-15400	15400	40.5871	0
n-Tetracosane	646-31-1	C24H50	24	50	292	391	202	-	0.7991	-14800	14800	40.5023	0
n-Tricosane	638-67-5	C23H48	23	48	280	451	202	-	0.7985	-14200	14200	40.4954	0
n-undecylbenzene	6742-54-7	C17H28	17	28	208	312	144	4.59	0.8553	-9832	9832	40.4294	0
n-Docosane	629-97-0	C22H46	22	46	268	369	185	-	0.7944	-13600	13600	40.3128	0
n-decylbenzene	104-72-3	C16H26	16	26	196	298	107	3.79	0.8555	-9222.3	9222.3	40.2535	0
n-Heneicosane	629-94-7	C21H44	21	44	256	359	177	-	0.7919	-13000	13000	40.2137	0
Benzene, 1-ethenyl-4-methyl	622-97-9	C9H10	9	10	112	172	46	-	0.9173	-4865.77	4865.77	39.8515	0
1-Nonadecene	18435-45-5	C19H38	19	38	232	331	157	-	0.7886	-11700	11700	39.7699	0
1,2-Dimethyl-3-Ethylbenzene	933-98-2	C10H14	10	14	124	194	65	-	0.8881	-5547.3	5547.3	39.7303	0
1,2,3,5-tetramethylbenzene	527-53-7	C10H14	10	14	124	198	71	-	0.8903	-5532	5532	39.7189	0
1,3-Dimethyl-2-Ethylbenzene	2870-04-4	C10H14	10	14	124	190	58	-	0.8864	-5548	5548	39.6593	0
1-ethenyl-4-methylbenzene	622-97-9	C9H10	9	10	112	172	53	-	0.9173	-4822.9	4822.9	39.5004	0
o-Ethylvinylbenzene	7564-63-8	C10H12	10	12	124	189	58	-	0.9017	-5431	5431	39.493	0
diphenylacetylene	501-65-5	C14H10	14	10	172	300	132	-	0.9657	-7031	7031	39.4758	0
Benzene, 1-ethenyl-2-methyl-	611-15-4	C9H10	9	10	112	170	47	-	0.9077	-4869.62	4869.62	39.4657	0
o-Diethylbenzene	135-01-3	C10H14	10	14	124	183.4	57	-	0.88	-5559.3	5559.3	39.4531	0
Benzene, 1-ethenyl-3-methyl	100-80-1	C9H10	9	10	112	170	51	-	0.9076	-4866.59	4866.59	39.4368	0
1-Eicosene	3452-07-1	C20H40	20	40	244	341	167	-	0.7882	-12200	12200	39.41	0
o-Cymene	527-84-4	C10H14	10	14	124	178	53	-	0.8766	-5554.8	5554.8	39.2689	0
1-Heptadecene	6765-39-5	C17H34	17	34	208	301	135	3.6	0.7852	-10400	10400	39.26	0
2-Phenyl-1-Butene	2039-93-2	C10H12	10	12	124	190	52	-	0.887	-5478.99	5478.99	39.1925	0
1,3-Dimethyl-4-Ethylbenzene	874-41-9	C10H14	10	14	124	188	57	-	0.8763	-5544	5544	39.1791	0
Benzene, 1-ethenyl-3-ethyl	7525-62-4	C10H12	10	12	124	190	60	-	0.8945	-5428	5428	39.156	0
cis-Propenylbenzene	766-90-5	C9H10	9	10	112	169	38	-	0.9088	-4823	4823	39.1352	0
1-ethenyl-2-methylbenzene	611-15-4	C9H10	9	10	112	170	53	-	0.9077	-4820	4820	39.0635	0
1-ethenyl-3-methylbenzene	100-80-1	C9H10	9	10	112	170	53	-	0.9076	-4818	4818	39.043	0
1,4-Dimethyl-2-Ethylbenzene	1758-88-9	C10H14	10	14	124	186	56	-	0.8732	-5543	5543	39.0334	0
1-Methyl-2-propylbenzene	1074-17-5	C10H14	10	14	124	185	53	-	0.8697	-5555.4	5555.4	38.964	0
1-Pentadecene	13360-61-7	C15H30	15	30	184	268.4	112	2.46	0.7764	-9226.6	9226.6	38.9322	0
1,2-Dimethyl-4-Ethylbenzene	934-80-5	C10H14	10	14	124	189	58	-	0.8706	-5542	5542	38.9102	0
phenanthrene	85-01-8	C14H10	14	10	172	338.4	171	-	0.98	-6828.2	6828.2	38.9049	0
Benzene, 1-ethenyl-4-ethyl	3454-07-7	C10H12	10	12	124	192	61	-	0.8884	-5430	5430	38.9033	0
1-ethyl-2-methylbenzene	611-14-3	C9H12	9	12	112	165.1	39	-	0.8807	-4946.1	4946.1	38.8931	0
cycloheptene	628-92-2	C7H12	7	12	88	115	-6	-	0.8228	-4159	4159	38.8867	0
trans-Propenylbenzene	873-66-5	C9H10	9	10	112	179	52	-	0.9023	-4819	4819	38.8231	0
1-Ethylcyclohexene	1453-24-3	C8H14	8	14	100	136	-	-	0.8176	-4734.58	4734.58	38.7099	0
phenylacetylene	536-74-3	C8H6	8	6	100	143	31	-	0.93	-4154.6	4154.6	38.6378	0
p-Diethylbenzene	105-05-5	C10H14	10	14	124	184	55	-	0.862	-5555.3	5555.3	38.6183	0
2,2,3,3-Tetramethylhexane	13475-81-5	C10H22	10	22	124	160	29	-	0.7609	-6291.6	6291.6	38.6071	0
m-Cymene	535-77-3	C10H14	10	14	124	175	50	-	0.861	-5549.5	5549.5	38.5332	0
m-Diethylbenzene	141-93-5	C10H14	10	14	124	181.1	56	-	0.8602	-5554.3	5554.3	38.5307	0
1,3-Dimethyl-5-Ethylbenzene	934-74-7	C10H14	10	14	124	184	53	-	0.8608	-5540	5540	38.4583	0
2,4-Dimethyl-3-Isopropylpentane	13475-79-1	C10H22	10	22	124	157	-	-	0.7545	-6311.42	6311.42	38.403	0
(2-propenyl)-benzene	300-57-2	C9H10	9	10	112	158	-	-	0.892	-4818.21	4818.21	38.3736	0
1-Methyl-3-propylbenzene	1074-43-7	C10H14	10	14	124	182	52	-	0.8569	-5551.6	5551.6	38.3642	0
1-Tridecene	2437-56-1	C13H26	13	26	160	232.8	79	1.63	0.7658	-8006	8006	38.3187	0
2,3,3,4-Tetramethylpentane	16747-38-9	C9H20	9	20	112	141.5	31	-	0.7547	-5682.2	5682.2	38.2889	0
(2-methylpropyl)-benzene	538-93-2	C10H14	10	14	124	172.7	55	-	0.8532	-5558	5558	38.2426	0
2,2,3,3-tetramethylpentane	7154-79-2	C9H20	9	20	112	140.2	16	-	0.753	-5681.5	5681.5	38.1979	0
1-ethyl-3-methylbenzene	620-14-4	C9H12	9	12	112	161.3	38	-	0.8645	-4943.8	4943.8	38.16	0
1,1,2-Trimethylcyclopentane	4259-00-1	C8H16	8	16	100	113.7	-	-	0.7724	-4925.86	4925.86	38.0473	0
styrene	100-42-5	C8H8	8	8	100	145.3	31	0.751	0.9016	-4219	4219	38.0385	0
1-ethyl-4-methylbenzene	622-96-8	C9H12	9	12	112	162	36	-	0.8614	-4942.7	4942.7	38.0147	0
3-METHYLUNDECANE	1002-43-3	C12H26	12	26	148	212	71	-	0.7485	-7511	7511	37.9864	0
1-Methylcyclohexene	591-49-1	C7H12	7	12	88	110.3	-	-	0.8102	-4124.42	4124.42	37.9728	0
2,2-dimethyl-3-ethylpentane	16747-32-3	C9H20	9	20	112	134	13	-	0.7438	-5687.1	5687.1	37.7684	0
1,1,3-Trimethylcyclopentane	4516-69-2	C8H16	8	16	100	104.9	-	-	0.766	-4925.86	4925.86	37.7321	0
1-Decyne	764-93-2	C10H18	10	18	124	174	50	-	0.7655	-6103.7	6103.7	37.6805	0
3,3,4-Trimethylhexane	16747-31-2	C9H20	9	20	112	139	-	-	0.7414	-5682.34	5682.34	37.6151	0
1-Nonyne	3452-09-3	C9H16	9	16	112	150.8	33	-	0.7658	-5493	5493	37.5584	0
2,2,3,4-Tetramethylpentane	1186-53-4	C9H20	9	20	112	133	11	-	0.7389	-5684	5684	37.4992	0
2,4-Dimethyl-3-ethylpentane	1068-87-7	C9H20	9	20	112	123	15	-	0.7365	-5690	5690	37.4168	0
1-Ethylcyclopentene	2146-38-5	C7H12	7	12	88	106.2	-	-	0.7936	-4147.46	4147.46	37.4025	0
3-Methylnonane	5911-04-6	C10H22	10	22	124	168	38	-	0.7354	-6291	6291	37.3097	0
3,7-Dimethyl-1,6-Octadiene	2436-90-0	C10H18	10	18	124	-	-	-	0.7601	-6079.59	6079.59	37.2669	0
2,3,3-Trimethylhexane	16747-28-7	C9H20	9	20	112	137	-	-	0.7345	-5678.76	5678.76	37.2415	0
5-Methylnonane	15869-85-9	C10H22	10	22	124	164	38	-	0.7326	-6291	6291	37.1676	0
4-Methylnonane	17301-94-9	C10H22	10	22	124	166	38	-	0.7323	-6291	6291	37.1524	0
2-Methylnonane	871-83-0	C10H22	10	22	124	167	41	-	0.7281	-6289	6289	36.9276	0
3-Methyl-3-ethylpentane	1067-08-9	C8H18	8	18	100	118.2	3	-	0.7274	-5071.6	5071.6	36.8908	0
2,2,3-Trimethylhexane	16747-25-4	C9H20	9	20	112	134	-	-	0.7257	-5677.27	5677.27	36.7857	0
3,3,5-Trimethylheptane	7154-80-5	C10H22	10	22	124	157	28	-	0.7248	-6290.3	6290.3	36.7678	0
3-Ethylheptane	15869-80-4	C9H20	9	20	112	143.1	22	-	0.7225	-5683.8	5683.8	36.6656	0
2,3,5-Trimethylhexane	1069-53-0	C9H20	9	20	112	131	-	-	0.7218	-5675.78	5675.78	36.5784	0
2,3-Dimethyl-2-Hexene	7145-20-2	C8H16	8	16	100	122	-	-	0.7366	-4959.79	4959.79	36.5338	0
2,4,4-Trimethylhexane	16747-30-1	C9H20	9	20	112	130.6	10	-	0.7201	-5679.6	5679.6	36.5168	0
2,7-Dimethyloctane	1072-16-8	C10H22	10	22	124	160	33	-	0.7202	-6283.62	6283.62	36.4957	0
2,2,4,4-Tetramethylpentane	1070-87-7	C9H20	9	20	112	122.2	3	-	0.7195	-5679.8	5679.8	36.4876	0
1-octyne	629-05-0	C8H14	8	14	100	126.2	16	-	0.7461	-4881.5	4881.5	36.4209	0
3-Methyloctane	2216-33-3	C9H20	9	20	112	144	24	-	0.717	-5681.2	5681.2	36.3698	0
4-Methyloctane	2216-34-4	C9H20	9	20	112	142	22	-	0.716	-5680.2	5680.2	36.3127	0
2,3,3-Trimethyl-1-pentene	560-23-6	C8H16	8	16	100	108	-	-	0.7308	-4964.75	4964.75	36.2824	0
2-Methyl-1-octene	4588-18-5	C9H18	9	18	112	144	23	-	0.7343	-5530	5530	36.2561	0
3-Ethylhexane	619-99-8	C8H18	8	18	100	118.5	6	0.454	0.7136	-5074.1	5074.1	36.2088	0
2,2,5,5-Tetramethylhexane	1071-81-4	C10H22	10	22	124	137	16	-	0.7148	-6267.7	6267.7	36.1303	0
2-Ethyl-3-methylbut-1-ene	7357-93-9	C7H14	7	14	88	86.3	-	-	0.715	-4444.45	4444.45	36.1112	0
2,3-Dimethyl-2-pentene	10574-37-5	C7H14	7	14	88	96	-	-	0.7277	-4359.51	4359.51	36.0502	0
2,2,4-Trimethylhexane	16747-26-5	C9H20	9	20	112	127	-	-	0.711	-5676.97	5676.97	36.0386	0
1-methylcyclopentene	693-89-0	C6H10	6	10	76	75	-17	-	0.7748	-3534	3534	36.0282	0
2-Ethyl-1-Hexene	1632-16-2	C8H16	8	16	100	-	6	-	0.727	-4950	4950	35.9865	0
2,6-Dimethylheptane	1072-05-5	C9H20	9	20	112	135	26	-	0.7089	-5673.8	5673.8	35.9121	0
cis-2-Octene	7642-04-8	C8H16	8	16	100	125.6	21	-	0.7243	-4947	4947	35.8311	0
3-ethyl-2-pentene	816-79-5	C7H14	7	14	88	95	-	-	0.7204	-4369.78	4369.78	35.7726	0
cis-4-Octene	7642-15-1	C8H16	8	16	100	122.6	17	-	0.7212	-4951.5	4951.5	35.7102	0
Acenaphthalene	208-96-8	C12H8	12	8	148	280	118	-	0.8987	-5875.9	5875.9	35.6802	0
2,4,4-trimethyl-2-pentene	107-40-4	C8H16	8	16	100	104.9	-1	-	0.7218	-4940.5	4940.5	35.6605	0
trans 2-octene	13389-42-9	C8H16	8	16	100	124.9	21.11	-	0.7199	-4950	4950	35.635	0
2,3-Dimethyl-1-Hexene	16746-86-4	C8H16	8	16	100	111	8	-	0.7172	-4947	4947	35.4799	0
trans-4-Octene	14850-23-8	C8H16	8	16	100	122.4	8	-	0.7141	-4950	4950	35.3479	0
cis-3-Methyl-2-hexene	10574-36-4	C7H14	7	14	88	97	-	-	0.712	-4367.27	4367.27	35.3352	0
trans-3,4-Dimethyl-2-Pentene	4914-92-5	C7H14	7	14	88	91	-	-	0.7124	-4360.19	4360.19	35.2977	0
cis-2,2-Dimethyl-3-hexene	690-92-6	C8H16	8	16	100	105.4	-	-	0.7086	-4972.58	4972.58	35.2357	0
4,4Í-dimethylbiphenyl	613-33-2	C14H14	14	14	172	294	-	-	0.917	-6601.97	6601.97	35.1977	0
2-methyl-1-heptene	15870-10-7	C8H16	8	16	100	119	10	-	0.7104	-4948	4948	35.1506	0
cis-3,4-Dimethyl-2-pentene	4914-91-4	C7H14	7	14	88	92	-	-	0.7092	-4360.19	4360.19	35.1392	0
cis-3-Methyl-3-hexene	4914-89-0	C7H14	7	14	88	95.3	-	-	0.7079	-4367.27	4367.27	35.1317	0
Cyclopentadiene	542-92-7	C5H6	5	6	64	41	-48	-	0.8021	-2798	2798	35.0668	0
6-Methyl-1-heptene	5026-76-6	C8H16	8	16	100	113	3	-	0.7079	-4953.2	4953.2	35.0637	0
trans-3-Methyl-3-hexene	3899-36-3	C7H14	7	14	88	94	-	-	0.705	-4367.27	4367.27	34.9878	0
2,3-Dimethyl-1-pentene	3404-72-6	C7H14	7	14	88	84	-	-	0.7051	-4366.13	4366.13	34.9836	0
2-Methyl-2-hexene	2738-19-4	C7H14	7	14	88	95	-	-	0.7038	-4364.53	4364.53	34.9063	0
2-Ethyl-1-Pentene	3404-71-5	C7H14	7	14	88	94	-10	-	0.7079	-4337	4337	34.8882	0
1-cis-2-cis-3-Trimethylcyclopentane	2613-69-6	C8H16	8	16	100	-	-	-	0.8098	-4289.7	4289.7	34.738	0
cis-3-Heptene	7642-10-6	C7H14	7	14	88	96	-9	-	0.703	-4343.3	4343.3	34.697	0
2,3,3-trimethyl-1-butene	594-56-9	C7H14	7	14	88	77.8	-17	-	0.705	-4329.9	4329.9	34.6884	0
3,3-Dimethyl-1-pentene	3404-73-7	C7H14	7	14	88	77	-	-	0.6974	-4371.84	4371.84	34.6468	0
cis-5-Methyl-2-Hexene	13151-17-2	C7H14	7	14	88	89	-	-	0.697	-4371.61	4371.61	34.6251	0
trans-2-Heptene	14686-13-6	C7H14	7	14	88	98	-1	-	0.7012	-4340	4340	34.5819	0
2,3-dimethyl-2-butene	563-79-1	C6H12	6	12	76	73.19	-16	-	0.708	-3709.8	3709.8	34.5597	0
cis-4-Methyl-2-hexene	3683-19-0	C7H14	7	14	88	86	-	-	0.6952	-4374.35	4374.35	34.5574	0
2-Methyl-1-hexene	6094-02-6	C7H14	7	14	88	92	-6	-	0.7	-4335	4335	34.483	0
1-Hexyne	693-02-7	C6H10	6	10	76	71.2	-21	-	0.7155	-3661	3661	34.4664	0
3,4-Dimethyl-1-pentene	7385-78-6	C7H14	7	14	88	82	-	-	0.6934	-4374.12	4374.12	34.4661	0
cis-4,4-Dimethyl-2-pentene	762-63-0	C7H14	7	14	88	80.4	-	-	0.6951	-4360.42	4360.42	34.4424	0
2,4-Dimethyl-2-pentene	625-65-0	C7H14	7	14	88	83.3	-	-	0.6954	-4357.45	4357.45	34.4338	0
trans-3-heptene	14686-14-7	C7H14	7	14	88	96	-6	-	0.6981	-4340	4340	34.429	0
1,2-Hexadiene	592-44-9	C6H10	6	10	76	76	-20	-	0.7149	-3660	3660	34.4281	0
2,4-Dimethyl-1-pentene	2213-32-3	C7H14	7	14	88	81.6	-	-	0.6943	-4363.16	4363.16	34.4243	0
trans-4-Methyl-2-hexene	3683-22-5	C7H14	7	14	88	88	-	-	0.6925	-4370.01	4370.01	34.389	0
4-methyl-1-hexene	3769-23-1	C7H14	7	14	88	87	-15	-	0.6942	-4350	4350	34.3156	0
2,6-Dimethyl-1,5-Heptadiene	6709-39-3	C9H16	9	16	112	143	-	-	0.7648	-5021.82	5021.82	34.2919	0
cis-2-methyl-3-hexene	15840-60-5	C7H14	7	14	88	86	-	-	0.69	-4371.61	4371.61	34.2774	0
3-Ethyl-1-pentene	4038-04-4	C7H14	7	14	88	84	-17	-	0.6917	-4349	4349	34.1841	0
trans-4,4-Dimethyl-2-pentene	690-08-4	C7H14	7	14	88	76.7	-	-	0.6889	-4366.13	4366.13	34.1799	0
trans-5-Methyl-2-hexene	7385-82-2	C7H14	7	14	88	87	-	-	0.6883	-4367.5	4367.5	34.1608	0
trans-2-Methyl-3-hexene	692-24-0	C7H14	7	14	88	88	-	-	0.6853	-4367.5	4367.5	34.0119	0
3-Methyl-1-hexene	3404-61-3	C7H14	7	14	88	84	-6	-	0.6871	-4346	4346	33.9334	0
trans-3-Methyl-2-pentene	616-12-6	C6H12	6	12	76	67.67	-27	-	0.693	-3718	3718	33.9023	0
4,4-Dimethyl-1-pentene	762-62-9	C7H14	7	14	88	72.5	-	-	0.6827	-4367.04	4367.04	33.8793	0
2-ethyl-1-butene	760-21-4	C6H12	6	12	76	64.7	-26	-	0.6894	-3724.9	3724.9	33.7888	0
cis-3-Methyl-2-Pentene	922-62-3	C6H12	6	12	76	70.4	-28	-	0.6886	-3718	3718	33.687	0
2,3-dimethylbutane	79-29-8	C6H14	6	14	76	58	-29	0.376	0.6616	-3847.6	3847.6	33.4944	0
cis-2-hexene	7688-21-3	C6H12	6	12	76	68.9	-26	-	0.6824	-3728	3728	33.4735	0
2-pentyne	627-21-4	C5H8	5	8	64	56	-30	-	0.7058	-3029.1	3029.1	33.4053	0
2-methyl-1-pentene	763-29-1	C6H12	6	12	76	62.1	-32	-	0.6799	-3722.1	3722.1	33.2981	0
cis-3-Hexene	7642-09-3	C6H12	6	12	76	66.4	-28	0.273	0.6778	-3733	3733	33.2925	0
2,3-dimethyl-1-butene	563-78-0	C6H12	6	12	76	55.59	-18	-	0.6803	-3717.9	3717.9	33.2801	0
trans-3-hexene	13269-52-8	C6H12	6	12	76	67.06	-	0.273	0.6772	-3726	3726	33.2006	0
trans-2-hexene	4050-45-7	C6H12	6	12	76	67.85	-27	-	0.6733	-3726.5	3726.5	33.0138	0
2,3-Pentadiene	591-96-8	C5H8	5	8	64	48.2	-37	-	0.695	-3038	3038	32.9908	0
1,2-Pentadiene	591-95-7	C5H8	5	8	64	44	-40	-	0.6926	-3046.7	3046.7	32.971	0
1-pentyne	627-19-0	C5H8	5	8	64	39.9	-34	-	0.6901	-3051	3051	32.8984	0
1-trans-2-cis-3-Trimethylcyclopentane	0	C8H16	8	16	100	-	-	-	0.768	-4282	4282	32.8858	0
1-cis-2-trans-3-Trimethylcyclopentane	19374-46-0	C8H16	8	16	100	-	-	-	0.7665	-4283.9	4283.9	32.8361	0
3-methyl-1-pentene	760-20-3	C6H12	6	12	76	-	-	-	0.6675	-3734	3734	32.7953	0
cis-4-methyl-2-pentene	691-38-3	C6H12	6	12	76	56.4	-32	-	0.669	-3725	3725	32.7898	0
1,5-Hexadiene	592-42-7	C6H10	6	10	76	59.2	-46	0.275	0.6878	-3620	3620	32.761	0
1,3-dimethylcyclohexane	591-21-9	C8H16	8	16	100	-	-	-	0.7694	-4257.1	4257.1	32.7541	0
trans-4-Methyl-2-pentene	674-76-0	C6H12	6	12	76	58.58	-29	-	0.6686	-3720.5	3720.5	32.7306	0
4-methyl-1-pentene	691-37-2	C6H12	6	12	76	54	-39	-	0.6642	-3732	3732	32.6157	0
cis-1,3-Pentadiene	1574-41-0	C5H8	5	8	64	44	-41	-	0.691	-2989.1	2989.1	32.2729	0
5-Methyl-1-hexene	3524-73-0	C7H14	7	14	88	85	-16	-	0.6877	-4126.9	4126.9	32.2508	0
3-Methyl-1,2-Butadiene	598-25-4	C5H8	5	8	64	40.8	-12	-	0.6806	-3032	3032	32.2434	0
2-methyl-2-butene	513-35-9	C5H10	5	10	64	38.5	-45	-	0.6623	-3108.8	3108.8	32.1712	0
Ethylacetylene (1-butyne)	107-00-6	C4H6	4	6	52	8.1	-63	-	0.6783	-2464.7	2464.7	32.1501	0
2-Butyne	503-17-3	C4H6	4	6	52	27.1	-31	-	0.691	-2418.9	2418.9	32.1435	0
1,2-dimethylcyclohexane	583-57-3	C8H16	8	16	100	-	-	-	0.7499	-4275.2	4275.2	32.0597	0
1,2-Butadiene	590-19-2	C4H6	4	6	52	11	-64	-	0.676	-2461.7	2461.7	32.0021	0
3,3-dimethyl-1-butene	558-37-2	C6H12	6	12	76	41.24	-28	-	0.6529	-3725	3725	32.0007	0
cis-2-pentene	627-20-3	C5H10	5	10	64	36.9	-47	0.214	0.6556	-3123	3123	31.9912	0
1,trans-2,cis-4-Trimethylcyclopentane	0	C8H16	8	16	100	-	-	-	0.7468	-4276.1	4276.1	31.9339	0
1,cis-2,cis-4-Trimethylcyclopentane	2613-72-1	C8H16	8	16	100	-	-	-	0.7443	-4279	4279	31.8486	0
1,cis-2,trans-4-Trimethylcyclopentane	4850-28-6	C8H16	8	16	100	-	-	-	0.7402	-4277.1	4277.1	31.6591	0
trans-2-Pentene	646-04-8	C5H10	5	10	64	36.3	-48	0.214	0.6431	-3119	3119	31.3411	0
trans-1,3-Pentadiene	2004-70-8	C5H8	5	8	64	42	-43	-	0.671	-2982.7	2982.7	31.2717	0
1,4-Pentadiene	591-93-5	C5H8	5	8	64	25.9	-55	-	0.6608	-3015.7	3015.7	31.1371	0
3-Methyl-1-butene	563-45-1	C5H10	5	10	64	20.1	-56	-	0.6213	-3125.3	3125.3	30.3398	0
cis-2-Butene	590-18-1	C4H8	4	8	52	3.72	-70	-	0.616	-2533.9	2533.9	30.017	0
2,2-Dimethylpropane	463-82-1	C5H12	5	12	64	9.5	-65	-	0.5852	-3250.4	3250.4	29.7208	0
2-methyl-1,5-hexadiene	4049-81-4	C7H12	7	12	88	88	-	-	0.7153	-3639.68	3639.68	29.5848	0
trans-2-Butene	624-64-6	C4H8	4	8	52	0.88	-72	-	0.599	-2530	2530	29.1437	0
1-Butene	106-98-9	C4H8	4	8	52	-6.3	-80	-	0.588	-2540.8	2540.8	28.7306	0
2-Methylpropene	115-11-7	C4H8	4	8	52	-7	-	-	0.589	-2524.2	2524.2	28.5914	0
1,3-Butadiene	106-99-0	C4H6	4	6	52	-4.6	-76	-	0.6149	-2409	2409	28.4864	0
1-Ethyl-3-methylcyclopentane	3726-47-4	C8H16	8	16	100	-	-	-	0.7739	-3656	3656	28.2938	0
2-Methylpropane	75-28-5	C4H10	4	10	52	-11.7	-83	-	0.551	-2649	2649	28.0692	0
Methylacetylene (Propyne)	74-99-7	C3H4	3	4	40	-23.2	-88	-	0.607	-1848.7	1848.7	28.054	0
1,4-dimethylcyclohexane	589-90-2	C8H16	8	16	100	-	-	-	0.7284	-3788.66	3788.66	27.5966	0
1,2,4-Trimethylcyclopentane	2815-58-9	C8H16	8	16	100	-	-	-	0.7486	-3674.1	3674.1	27.5043	0
Propadiene	463-49-0	C3H4	3	4	40	34.8	-101.1	-	0.584	-1856.3	1856.3	27.102	0
Ethene	74-85-1	C2H4	2	4	28	-103.8	-149	-	0.5678	-1323	1323	26.8285	0
1,1,2,4-Tetramethylcyclopentane	90674-66-1	C9H16	9	16	112	-	-	-	0.8471	-3404	3404	25.7458	0
cis-Hydrindane	4551-51-3	C9H16	9	16	112	-	-	-	0.8405	-3399.9	3399.9	25.5144	0
Propene	115-07-1	C3H6	3	6	40	-47.6	-108	-	0.505	-1926.2	1926.2	24.3183	0
cis-1,2-Diethylcyclopentane	932-39-8	C9H18	9	18	112	-	-	-	0.7457	-3070.9	3070.9	20.4462	0
1-Methyl-1-propylcyclopentane	16631-63-3	C9H18	9	18	112	-	-	-	0.6884	-3173.87	3173.87	19.508	0
1,1-Diethylcyclopentane	2721-38-2	C9H18	9	18	112	-	-	-	0.6889	-3171.1	3171.1	19.5051	0
cis,cis-1,3,5-trimethylcyclohexane	1795-27-3	C9H18	9	18	112	-	-	0.632	0.679	-3180.07	3180.07	19.2792	0
Acetylene	74-86-2	C2H2	2	2	28	-84.7	-	-	0.377	-1257	1257	16.9246	0
2-Ethyl-1,1-dimethylcyclopentane	54549-80-3	C9H18	9	18	112	-	-	-	0.7038	-2567.8	2567.8	16.1359	0
1,2,3-Trimethylcyclohexane	1678-97-3	C9H18	9	18	112	-	-	-	0.6912	-2565.47	2565.47	15.8326	0
1,1,4-Trimethylcyclohexane	7094-27-1	C9H18	9	18	112	-	-	-	0.617	-1959.3	1959.3	10.7936	0
1,2-diphenylethane	103-29-7	C14H14	14	14	172	280	128.889	-	0.978	-7280.2	7280.2	41.3956	1
1,2,4,5-tetramethylbenzene	95-93-2	C10H14	10	14	124	197	54	-	0.838	-5506.4	5506.4	37.2126	1
1-Methyl-4-propylbenzene	1074-55-1	C10H14	10	14	124	183	53	-	0.8544	-5552.8	5552.8	38.2606	2
1,3,5-triisopropylbenzene	717-74-8	C15H24	15	24	184	249	86.67	-	0.8545	-	-	-	2.8
p-Cymene	99-87-6	C10H14	10	14	124	177	47	3.402	0.8573	-5549.8	5549.8	38.3697	4
3,3-Dimethylhexane	563-16-6	C8H18	8	18	100	111.9	-1	0.5	0.71	-5066.9	5066.9	35.975	4.9
1,3-diethylbenzene	141-93-5	C10H14	10	14	124	181.1	56	-	0.8602	-	-	-	5
(1-methylpropyl)-benzene	135-98-8	C10H14	10	14	124	173.3	52	1.045	-	-5561.4	5561.4	-	6
Naphthalene, 1-butyl	1634-09-9	C14H16	14	16	172	288	128	-	0.9738	-7425	7425	42.0376	6
2-methylnaphthalene	91-57-6	C11H10	11	10	136	241.1	97	-	1.0058	-5582.9	5582.9	41.2888	6
toluene	108-88-3	C7H8	7	8	88	110.6	4	0.59	0.8623	-3734	3734	36.589	6
1-Methyl-1-Ethylcyclopentane	16747-50-5	C8H16	8	16	100	121.5	6	-	-	-5537.94	5537.94	-	6.1
1,4-dimethylbenzene (p-Xylene)	106-42-3	C8H10	8	10	100	138.3	25	0.648	0.8565	-4333	4333	37.1121	6.2
ethylbenzene	100-41-4	C8H10	8	10	100	136.2	21	0.678	0.8626	-4344.8	4344.8	37.4782	6.3
isopropylbenzene	98-82-8	C9H12	9	12	112	152.4	36	0.791	0.864	-4951	4951	38.1934	7
1,3-dimethylbenzene (m-Xylene)	108-38-3	C8H10	8	10	100	139.1	25	0.62	0.8598	-4331.8	4331.8	37.2448	7
1,3,5-triethylbenzene	102-25-0	C12H18	12	18	148	215.8	81	-	0.8631	-6763	6763	39.4402	7.6
n-Propyltetralin	0	C13H18	13	18	160	-	-	-	-	-	-	-	8
1,3,5-trimethylbenzene	108-67-8	C9H12	9	12	112	164.7	55.4	1.154	0.8615	-4929.1	4929.1	37.9145	8
1,2-dimethylbenzene (o-xylene)	95-47-6	C8H10	8	10	100	144.4	32	0.81	0.8755	-4333	4333	37.9354	8.3
2,4,4-trimethyl-1-pentene	107-39-1	C8H16	8	16	100	101.3	-6	-	0.715	-4937.3	4937.3	35.3017	8.5
Indane	496-11-7	C9H10	9	10	112	177.8	140	-	0.9639	-4762.6	4762.6	40.9881	8.6
1,2,3,4-tetrahydronaphthalene (Tetralin)	119-64-2	C10H12	10	12	124	207.2	71	2.202	0.9645	-5357.5	5357.5	41.6718	8.9
1,2,4-trimethylbenzene	95-63-6	C9H12	9	12	112	169.4	44	1.116	0.8758	-4930.7	4930.7	38.5563	8.9
2,2,4,6,6-pentamethylheptane	13475-82-6	C12H26	12	26	148	178	-	-	0.7463	-	-	-	9
2,2,4,5,6-Pentamethylheptane	62199-64-8	C12H26	12	26	148	-	-	-	-	-	-	-	9
1,2,3-trimethylbenzene	526-73-8	C9H12	9	12	112	176	44	-	0.8944	-4934	4934	39.4015	10.1
diphenylmethane	101-81-5	C13H22	13	22	160	264.2	130	-	1.001	-6656.5	6656.5	41.6447	11
2-Methyl-3-ethylpentane	609-26-7	C8H18	8	18	100	115.6	2	-	0.7193	-5073.1	5073.1	36.4908	12
n-butylbenzene	104-51-8	C10H14	10	14	124	183.3	50	1.035	0.8601	-5564.4	5564.4	38.5963	12.9
2,2,3-trimethylbutane	464-06-2	C7H16	7	16	88	80.8	-24	0.579	0.6901	-4452.6	4452.6	34.9175	12.9
2-methyl-1,3-butadiene	78-79-5	C5H8	5	8	64	34	-54	0.223	0.679	-2984.2	2984.2	31.6605	13
2,3,4-trimethylpentane	565-75-3	C8H18	8	18	100	113.4	0	-	0.7191	-5069.4	5069.4	36.4541	14
2,2,3-Trimethylpentane	564-02-3	C8H18	8	18	100	109.8	-3	0.598	0.7161	-5067.5	5067.5	36.2884	14
2,2,4,4,6,8,8-heptamethylnonane	4390-04-9	C16H34	16	34	196	246	95	-	-	-9930.2	9930.2	-	14.2
benzene	71-43-2	C6H6	6	6	76	80.08	-11	0.652	0.8765	-3136	3136	36.1672	14.3
trans-1,2-Dimethylcyclohexane	6876-23-9	C8H16	8	16	100	123.4	17	-	-	-5537.94	5537.94	-	16
n-propylbenzene	103-65-1	C9H12	9	12	112	159.2	30	0.855	0.8593	-4954.2	4954.2	38.0102	16
cis-1,4-Dimethylcyclohexane	624-29-3	C8H16	8	16	100	124.3	16	-	-	-5540.58	5540.58	-	16.9
cis-1,3-Dimethylcyclohexane	638-04-0	C8H16	8	16	100	124.4	15	-	-	-5549.98	5549.98	-	17
1,2,3,4-tetramethylbenzene	488-23-3	C10H14	10	14	124	205	68	-	0.9052	-5537.6	5537.6	40.4245	17
3,3-Diethylpentane	1067-20-5	C9H20	9	20	112	146.2	21	-	0.7536	-5684.4	5684.4	38.2479	17
2,3,3-Trimethylpentane	560-21-4	C8H18	8	18	100	114.7	0	-	0.7262	-5068.8	5068.8	36.8096	17
Isopropylcyclopentane	3875-51-2	C8H16	8	16	100	126.4	10	-	0.7794	-5555	5555	43.2957	17.2
2-Octylnaphthalene	2876-44-0	C18H24	18	24	220	-	-	-	-	-	-	-	18
n-pentylbenzene	538-68-1	C11H16	11	16	136	203	66	1.33	0.8585	-6174	6174	38.9734	18
cyclohexene	110-83-8	C6H10	6	10	76	82.9	-12	0.65	0.811	-3532	3532	37.6902	18.1
cis-1,2-Dimethylcyclohexane	2207-01-4	C8H16	8	16	100	129.7	22	-	0.8965	-5892.1	5892.1	52.8227	18.9
cis-1-Methyl-2-Ethylcyclopentane	930-89-2	C8H16	8	16	100	128	-	-	0.8659	-5880.9	5880.9	50.9227	18.9
ethylcyclohexane	1678-91-7	C8H16	8	16	100	131.8	22	0.843	-	-6077.8	6077.8	-	19
n-Propylcyclopentane	2040-96-2	C8H16	8	16	100	130.9	15	0.68	0.8219	-6063.9	6063.9	49.8392	19
2,5-DIMETHYL-2,4-HEXADIENE	764-13-6	C8H14	8	14	100	135.2	24	-	0.7577	-4777.8	4777.8	36.2014	19.9
4,5-diethyloctane	1636-41-5	C12H26	12	26	148	-	-	-	-	-	-	-	20
cyclopentene	142-29-0	C5H8	5	8	64	44.2	-29	0.346	0.772	-2939.3	2939.3	35.4553	20
2-Methyl-1-butene	563-46-2	C5H10	5	10	64	31.1	-20	0.224	0.6504	-3115.9	3115.9	31.6653	20
1-Pentene	109-67-1	C5H10	5	10	64	30	-54	0.197	0.6405	-3130.4	3130.4	31.3285	20
1,1,3-Trimethylcyclohexane	3073-66-3	C9H18	9	18	112	136.6	-	-	-	-6087	6087	-	20.3
trans-1,3,5-trimethylcyclohexane	1795-26-2	C9H18	9	18	112	141	19	0.714	0.8131	-6090	6090	44.2123	20.4
1,1,2-Trimethylcyclohexane	7094-26-0	C9H18	9	18	112	146	-	-	0.7902	-6090.2	6090.2	42.9685	20.5
n-butane	106-97-8	C4H10	4	10	52	-0.5	-74	-	0.573	-2657.3	2657.3	29.2814	20.6
isoButylcyclopentane	3788-32-7	C9H18	9	18	112	148	-	-	0.7912	-6113.94	6113.94	43.1906	21
2,2,4-trimethylpentane (iso-octane)	540-84-1	C8H18	8	18	100	99.2	-12	0.502	0.6878	-5065.3	5065.3	34.8391	21
2-methylbutane	78-78-4	C5H12	5	12	64	27.83	-56	0.225	0.6201	-3239.5	3239.5	31.3877	21
2,3-dimethylpentane	565-59-3	C7H16	7	16	88	89.8	-15	0.406	0.6908	-4460.8	4460.8	35.0173	21.7
1,5-cyclooctadiene	111-78-4	C8H12	8	12	100	149	35	-	0.8127	-6116.22	6116.22	49.7065	21.9
naphthalene	91-20-3	C10H8	10	8	124	218	79	-	1.0253	-4980.9	4980.9	41.1848	22
1-Heptyne	628-71-7	C7H12	7	12	88	99.8	-2	-	0.7328	-4271.7	4271.7	35.5716	22
cyclooctane	292-64-8	C8H16	8	16	100	151.1	30	-	-	-6118.83	6118.83	-	22.3
2-pentene (racemic)	109-68-2	C5H10	5	10	64	-	-	-	-	-	-	-	22.6
2-Phenyl-2-undecene	0	C17H26	17	26	208	-	-	-	-	-	-	-	23
2-methyl-2-pentene	625-27-4	C6H12	6	12	76	67.3	-12	-	0.6863	-3713.5	3713.5	33.5339	23.8
2,6,7-Trimethyl-2,6-tridecadiene	0	C16H30	16	30	196	-	-	-	-	-	-	-	24
n-Butylcyclopentane	2040-95-1	C9H18	9	18	112	156	32	0.887	0.8037	-6700.7	6700.7	48.0835	24
isopropylcyclohexane	696-29-7	C9H18	9	18	112	154.4	35	-	0.7952	-6127.64	6127.64	43.5062	24
2,2,5-trimethylhexane	3522-94-9	C9H20	9	20	112	124	13	-	0.7072	-5666.4	5666.4	35.7793	24
n-propylcyclohexane	1678-92-8	C9H18	9	18	112	156.7	31	1.003	-	-7053	7053	-	24.4
α-pinene	80-56-8	C10H16	10	16	124	156.3	30	1.4	0.7965	-6724.03	6724.03	43.191	24.4
2,2-dimethylbutane	75-83-2	C6H14	6	14	76	49.7	-48	0.365	0.6444	-3841.1	3841.1	32.5685	24.4
3,4-dimethylhexane	583-48-2	C8H18	8	18	100	117.7	4	-	0.7151	-5072.8	5072.8	36.2756	25.1
β-pinene	127-91-3	C10H16	10	16	124	165.8	31	1.7	0.8076	-7310.32	7310.32	47.6114	25.3
iso-Butylcyclohexane	1678-98-4	C10H20	10	20	124	171.3	41	-	0.801	-7333.42	7333.42	47.3715	25.7
n-hexylbenzene	1077-16-3	C12H18	12	18	148	226	80	1.67	0.8575	-6783.7	6783.7	39.3042	26
4-methylheptane	589-53-7	C8H18	8	18	100	117.7	6	-	0.7046	-5072.8	5072.8	35.7429	26.9
Cyclononane	293-55-0	C9H18	9	18	112	173	-	-	0.8048	-7943.41	7943.41	57.0791	27
tert-Butylcyclohexane	3178-22-1	C10H20	10	20	124	171.6	42	-	0.8109	-7920.08	7920.08	51.7935	27
1-hexene	592-41-6	C6H12	6	12	76	63.4	-31	0.26	0.6685	-3739.7	3739.7	32.8946	27.3
4-Methyl-1-cyclohexene	591-47-9	C7H12	7	12	88	71.8	-29	-	0.7991	-	-	-	28
ocimene	13877-91-3	C10H16	10	16	124	-	-	-	-	-	-	-	28
2,4-dimethylpentane	108-08-7	C7H16	7	16	88	80.4	-12	0.361	0.6727	-4455	4455	34.0554	28.6
limonene	138-86-3	C10H16	10	16	124	176	45	-	0.8138	-8530.36	8530.36	55.9839	29
2,4-dimethylhexane	589-43-5	C8H18	8	18	100	109.4	10	-	0.6962	-5067.3	5067.3	35.2785	29
(R )-(+ )-limonene	5989-27-5	C10H16	10	16	124	177.6	45	-	0.8081	-8553.66	8553.66	55.7437	29.3
1,1-DIETHYLCYCLOHEXANE	78-01-3	C10H20	10	20	124	178	49	-	0.8163	-9139.86	9139.86	60.1683	29.8
Sec-Butylcyclohexane	7058-01-7	C10H20	10	20	124	179.3	46	-	0.811	-9162.86	9162.86	59.9281	29.9
5,6-dibutyldecane	0	C18H38	18	38	220	-	-	-	-	-	-	-	30
2,2-dimethylpentane	590-35-2	C7H16	7	16	88	79.2	-15	0.38	0.6739	-4450.8	4450.8	34.084	30
n-pentane	109-66-0	C5H12	5	12	64	36.06	-40	0.24	0.6262	-3244.9	3244.9	31.7493	30
Pentylcyclopentane	3741-00-2	C10H20	10	20	124	180	-	1.152	-	-9210	9210	-	30.5
n-butylcyclohexane	1678-93-9	C10H20	10	20	124	180.9	48	1.31	0.8186	-9749	9749	64.3591	30.5
3-methylpentane	96-14-0	C6H14	6	14	76	63.3	-21	0.3	0.6598	-3851.4	3851.4	33.4362	30.7
γ-terpinene	99-85-4	C10H16	10	16	124	183	51	-	-	-9772.81	9772.81	-	31
trans-Decahydronaphthalene (trans-decalin)	493-02-7	C10H18	10	18	124	187.3	52	2.128	-	-10359.9	10359.9	-	31
2,3-Dimethylhexane	584-94-1	C8H18	8	18	100	115.6	5.333	-	0.6912	-5071.9	5071.9	35.057	31.1
farnesene	502-61-4	C15H24	15	24	184	130	-	-	0.841	-	-	-	32
Bisabolene	0	C15H24	15	24	184	-	-	-	-	-	-	-	32
n-octylbenzene	2189-60-8	C14H22	14	22	172	263	107	2.56	0.8562	-8003	8003	39.8382	32
4-Vinyl-1-Cyclohexene	100-40-3	C8H16	8	16	100	130	16	-	0.8299	-4626	4626	38.3912	32
1-heptene	592-76-7	C7H14	7	14	88	94	-8	0.35	0.697	-4349.9	4349.9	34.4532	32
cis-Decahydronaphthalene (cis-decalin)	493-01-6	C10H18	10	18	124	195.8	50	3.381	-	-10383.2	10383.2	-	32.2
2-Phenyloctane	777-22-0	C14H22	14	22	172	-	-	-	-	-	-	-	33
Cyclodecane	293-96-9	C10H20	10	20	124	202.3	-	-	0.8223	-10969	10969	72.7404	34
trans-3-octene	14919-01-8	C8H16	8	16	100	123.2	9	0.479	0.7152	-4950	4950	35.4024	34
3-ethylpentane	617-78-7	C7H16	7	16	88	93.4	-12	-	0.6982	-4464.6	4464.6	35.4225	34.1
n-pentylcyclohexane	4292-92-6	C11H22	11	22	136	204	-	1.718	-	-10992.5	10992.5	-	34.2
2-methylpentane	107-83-5	C6H14	6	14	76	60.21	-35	0.31	0.65	-3849.2	3849.2	32.9208	34.5
Hexylcyclopentane	4457-00-5	C11H20	11	20	136	206	-	1.88	0.8239	-11579.1	11579.1	70.1475	35
n-heptylbenzene	1078-71-3	C13H20	13	20	160	242	95	2.07	0.8567	-7393.4	7393.4	39.587	35
heptylcyclopentane	5617-42-5	C12H24	12	24	148	224	-	2.36	-	-11602.7	11602.7	-	35.1
n-Hexylcyclohexane	4292-75-5	C12H24	12	24	148	225	-	2.21	0.8254	-12189.4	12189.4	67.9804	35.8
bicyclohexyl	92-51-3	C12H22	12	22	148	239	74	3.75	-	-12212.2	12212.2	-	36
3-octene	592-98-3	C8H16	8	16	100	-	-	-	-	-	-	-	36.03
octylcyclopentane	1795-20-6	C13H26	13	26	160	242	-	2.91	-	-12300	12300	-	37
3-methylheptane	589-81-1	C8H18	8	18	100	118.9	6	-	0.7017	-5072.1	5072.1	35.5909	37
2,2-Dimethylheptane	1071-26-7	C9H20	9	20	112	133	24	-	0.7105	-5672	5672	35.9817	37.2
Vinyl cyclohexane	695-12-5	C8H16	8	16	100	127	-	-	0.8166	-	-	-	38
cis-3-octene	14850-22-7	C8H16	8	16	100	123	17	-	0.7159	-4951.5	4951.5	35.4478	38.1
Heptylcyclohexane	5617-41-4	C13H26	13	26	160	244	-	2.8	0.8267	-12798.5	12798.5	66.1285	38.8
4-propyldecane	17312-61-7	C13H28	13	28	160	-	-	-	-	-	-	-	39
2-Methyl-2-phenylpentadecane	29138-94-1	C22H38	22	38	268	-	-	-	-	-	-	-	39
5-Phenyleicosane	2400-04-6	C26H46	26	46	316	-	-	-	-	-	-	-	39
nonylcyclopentane	2882-98-6	C14H28	14	28	172	262	-	3.55	-	-12821.8	12821.8	-	39.4
7,8-dimethyltetradecane	2801-86-7	C16H34	16	34	196	-	-	-	-	-	-	-	40
1-octene	111-66-0	C8H16	8	16	100	121.3	8	0.47	0.7149	-4961	4961	35.4662	40
2,2-dimethylhexane	590-73-8	C8H18	8	18	100	106.8	-4	-	0.6953	-5062.6	5062.6	35.2003	40
7-Phenyltridecane	2400-01-3	C19H32	19	32	232	-	-	-	-	-	-	-	41
1,9-decadiene	1647-16-1	C10H18	10	18	124	164	43	-	0.75	-6062	6062	36.6653	41
n-Octylcyclohexane	1795-15-9	C14H28	14	28	172	263	-	3.5	-	-13408.9	13408.9	-	41.1
4-Phenyldodecane	2719-64-4	C18H30	18	30	220	-	-	-	-	-	-	-	42
3-methylhexane	589-34-4	C7H16	7	16	88	92	-4	0.372	0.687	-4462.7	4462.7	34.8395	42
2,5-dimethylhexane	592-13-2	C8H18	8	18	100	109.1	-2	-	0.6901	-5064.1	5064.1	34.9474	42.4
Decylcyclopentane	1795-21-7	C15H30	15	30	184	279	-	3.55	-	-13539.5	13539.5	-	42.7
2-octene	111-67-1	C8H16	8	16	100	-	-	-	-	-	-	-	43
2-methylhexane	591-76-4	C7H16	7	16	88	90	-23	0.378	0.6787	-4459.6	4459.6	34.3947	43.5
cis-2-heptene	6443-92-1	C7H14	7	14	88	97	-8	-	0.708	-4342	4342	34.9334	44
n-hexane	110-54-3	C6H14	6	14	76	68.72	-21.65	0.326	0.6606	-3855.1	3855.1	33.5089	44.8
5-butyldodecane	6118-01-0	C16H34	16	34	196	-	-	-	-	-	-	-	45
3-ethyldecane	17085-96-0	C12H26	12	26	148	-	-	-	-	-	-	-	47
9,10-dipropyloctadecane	0	C24H50	24	50	292	-	-	-	-	-	-	-	47
7-Hexyl-7-pentadecene	0	C21H42	21	42	256	-	-	-	-	-	-	-	47
2-methylheptane	592-27-8	C8H18	8	18	100	117.6	4	0.521	0.698	-5069.4	5069.4	35.3844	47
n-Nonylcyclohexane	2883-02-5	C15H30	15	30	184	281	-	4.31	-	-14126.5	14126.5	-	47.6
perhydrophenanthrene	5743-97-5	C14H24	14	24	172	284	-	-	-	-14154.3	14154.3	-	47.8
8-propylpentadecane	0	C18H38	18	38	220	-	-	-	-	-	-	-	48
2-Methyloctane	3221-61-2	C9H20	9	20	112	143	23	-	0.7095	-5679.1	5679.1	35.9761	48.7
2-Phenyltetradecane	4534-59-2	C20H34	20	34	244	-	-	-	-	-	-	-	49
Cyclohexane, decyl	1795-16-0	C16H32	16	32	196	298	131	5.24	0.83	-14741.2	14741.2	62.4246	49.1
1-decene	872-05-9	C10H20	10	20	124	171	38	0.805	0.7408	-6180.9	6180.9	36.9259	49.1
Dodecylcyclohexane	1795-17-1	C18H36	18	36	220	331	-	7.52	-	-14768.6	14768.6	-	50
n-nonylbenzene	1081-77-2	C15H24	15	24	184	280	99	3.13	0.8584	-8612.7	8612.7	40.1801	50
n-Tridecylcyclohexane	6006-33-3	C19H38	19	38	232	332	-	8.89	-	-15355.6	15355.6	-	51
2,6-Dimethyl-1-heptene	3074-78-0	C9H18	9	18	112	-	-	-	-	-	-	-	51
2-Phenylundecane	4536-88-3	C17H28	17	28	208	-	-	-	-	-	-	-	51
n-dodecylbenzene	123-01-3	C18H30	18	30	220	329	140	5.45	0.8551	-10400	10400	40.4229	51
1-nonene	124-11-8	C9H18	9	18	112	146.9	22	0.62	0.7253	-5571.6	5571.6	36.0811	51
2,6-dimethyloctane	2051-30-1	C10H22	10	22	124	158	34	-	0.7313	-	-	-	51.7
n-Tetradecylcyclohexane	1795-18-2	C20H40	20	40	244	358	-	-	-	-15383.3	15383.3	-	52
5-butylnonane	17312-63-9	C13H28	13	28	160	-	-	-	-	-	-	-	53
10,13-dimethyldocosane	0	C24H50	24	50	292	-	-	-	-	-	-	-	56
n-heptane	142-82-5	C7H16	7	16	88	98.38	-4	0.418	0.6795	-4464.7	4464.7	34.4746	56
1-dodecene	112-41-4	C12H24	12	24	148	213.4	67	1.3	0.7584	-7398	7398	37.9098	56.8
N-Pentadecylcyclohexane	6006-95-7	C21H42	21	42	256	371	-	-	-	-15970.8	15970.8	-	58
2,5-dimethylundecane	17301-22-3	C13H28	13	28	160	-	-	-	-	-	-	-	58
2,6,10-trimethyldodecane	3891-98-3	C15H32	15	32	184	-	-	-	-	-	-	-	58
2,2-dimethyloctane	15869-87-1	C10H22	10	22	124	154	31	-	0.7208	-6281	6281	36.5108	59
9,10-dimethyloctadecane	68649-11-6	C20H42	20	42	244	-	-	-	-	-	-	-	60
2,6,10-Trimethyltridecane	3891-99-4	C16H34	16	34	196	-	-	-	-	-	-	-	60.8
n-octane	111-65-9	C8H18	8	18	100	125.62	13	0.542	0.6986	-5074.2	5074.2	35.4484	63.8
1-Undecene	821-95-4	C11H22	11	22	136	192.7	54	1.03	0.7503	-6787.8	6787.8	37.4477	65
9-methylheptadecane	18869-72-2	C18H38	18	38	220	-	-	-	-	-	-	-	66
7,8-diethyltetradecane	500020-70-2	C18H38	18	38	220	-	-	-	-	-	-	-	67
7-butyltridecane	93816-20-7	C17H36	17	36	208	-	-	-	-	-	-	-	70
n-tetradecylbenzene	1459-10-5	C20H34	20	34	244	347	174	7.66	0.8549	-11700	11700	40.9932	72
n-nonane	111-84-2	C9H20	9	20	112	150.8	31	0.711	0.7192	-5684.6	5684.6	36.5033	73
n-decane	124-18-5	C10H22	10	22	124	174.1	46	0.928	0.7266	-6294.2	6294.2	36.882	76.9
n-undecane	1120-21-4	C11H24	11	24	136	195.9	69	1.17	0.7402	-6903.6	6903.6	37.5739	81.1
1-Tetradecene	1120-36-1	C14H28	14	28	172	251.1	97	2	0.7745	-8614	8614	38.788	82.7
7-hexylpentadecane	0	C21H44	21	44	256	-	-	-	-	-	-	-	83
8-Hexylpentadecane	13475-75-7	C21H44	21	44	256	-	-	-	-	-	-	-	83
1-hexadecene	629-73-2	C16H32	16	32	196	285	132	2.99	0.7811	-9836.7	9836.7	39.2013	86
n-dodecane	112-40-3	C12H26	12	26	148	216.3	74	1.508	0.7495	-7513.7	7513.7	38.0508	87.6
9-heptylheptadecane	0	C24H50	24	50	292	-	-	-	-	-	-	-	88
1-Octadecene	112-88-9	C18H36	18	36	220	179	148	4.31	0.7891	-11100	11100	39.8137	90
n-tridecane	629-50-5	C13H28	13	28	160	235.4	79	1.883	0.7564	-8122.9	8122.9	38.401	90
2-methylheptadecane	1560-89-0	C18H38	18	38	220	-	-	-	-	-	-	-	91
n-tetradecane	629-59-4	C14H30	14	30	172	253.5	100	2.18	0.7596	-8732.8	8732.8	38.5665	96.1
n-pentadecane	629-62-9	C15H32	15	32	184	270.6	114	2.863	0.7685	-9342.4	9342.4	39.0198	98
n-hexadecane	544-76-3	C16H34	16	34	196	286.9	136	3.34	0.7701	-9951.5	9951.5	39.1003	100
2-methyloctadecane	1560-88-9	C19H40	19	40	232	-	-	-	-	-	-	-	104.4
n-heptadecane	629-78-7	C17H36	17	36	208	303	148	3.74	0.778	-10600	10600	39.6481	105
n-octadecane	593-45-3	C18H38	18	38	220	316	165	-	0.7768	-11200	11200	39.5462	108.3
n-Nonadecane	629-92-5	C19H40	19	40	232	330	168	-	0.7855	-11800	11800	39.9522	110
n-eicosane	112-95-8	C20H42	20	42	244	344.1	167	-	0.7886	-12400	12400	40.0764	112
trans-1,3-HEXADIENE	592-48-3	C6H10	6	10	76	-	-19	-	-	-3594	3594	-	-
trans-2-METHYL-1,3-PENTADIENE	926-54-5	C6H10	6	10	76	-	-20	-	-	-3610	3610	-	-
1,4-HEXADIENE	592-45-0	C6H10	6	10	76	65	-21	-	-	-3611	3611	-	-
3-METHYL-1,4-PENTADIENE	1115-08-8	C6H10	6	10	76	-	-38	-	-	-3621	3621	-	-
alpha-METHYLSTYRENE	25014-31-7	C9H10	9	10	112	-	-	-	-	-4821.4	4821.4	-	-
cis-2-PHENYLBUTENE-2	2082-61-3	C10H12	10	12	124	-	-	-	-	-5420	5420	-	-
trans-2-PHENYLBUTENE-2		C10H12	10	12	124	-	-	-	-	-5420	5420	-	-
7-METHYL-1-OCTENE	13151-06-9	C9H18	9	18	112	139	18	-	-	-5563.5	5563.5	-	-
1,2,3-TRIMETHYL-4-ETHYLBENZENE	61827-86-9	C11H16	11	16	136	-	73	-	-	-6096	6096	-	-
1,2,4-TRIMETHYL-3-ETHYLBENZENE	61827-87-0	C11H16	11	16	136	-	73	-	-	-6098	6098	-	-
1,2-DIMETHYL-3-PROPYLBENZENE		C11H16	11	16	136	-	-	-	-	-6155	6155	-	-
1-ETHYL-2-ISOPROPYLBENZENE		C11H16	11	16	136	-	-	-	-	-6164	6164	-	-
trans-2-DECENE	20063-97-2	C10H20	10	20	124	173.4	46	-	-	-6166	6166	-	-
cis-2-DECENE	20348-51-0	C10H20	10	20	124	-	47	-	-	-6170	6170	-	-
8-METHYL-1-NONENE	26741-24-2	C10H20	10	20	124	-	-	-	-	-6173.1	6173.1	-	-
4-ISOBUTYLSTYRENE	63444-56-4	C12H16	12	16	148	-	52	-	-	-6639	6639	-	-
1,2,3-TRIETHYLBENZENE	42205-08-3	C12H18	12	18	148	172	79	-	-	-6768	6768	-	-
trans-2-DODECENE	7206-13-5	C12H24	12	24	148	-	78	-	-	-7385	7385	-	-
cis-2-DODECENE	7206-26-0	C12H24	12	24	148	-	78	-	-	-7390	7390	-	-
1-PHENYLINDENE	1961-96-2	C15H12	15	12	184	158	166	-	-	-7530	7530	-	-
1,2,3,5-TETRAETHYLBENZENE	38842-05-6	C14H22	14	22	172	250	103	-	-	-7973	7973	-	-
NAPHTHACENE	92-24-0	C18H12	18	12	220	-	-	-	-	-8692.9	8692.9	-	-
Benz[a]anthracene	56-55-3	C18H12	18	12	220	438	235	-	-	-8704.9	8704.9	-	-
2,3-DIMETHYL-2,3-DIPHENYLBUTANE	1889-67-4	C18H22	18	22	220	-	139	-	-	-9800	9800	-	-
TRIPHENYLETHYLENE	58-72-0	C20H16	20	16	244	220	201	-	-	-10000	10000	-	-
1,1,2-TRIPHENYLETHANE	1520-42-9	C20H18	20	18	244	-	168	-	-	-10200	10200	-	-
TETRAPHENYLMETHANE	630-76-2	C25H20	25	20	304	431	252	-	-	-12500	12500	-	-
1,1,2,2-TETRAPHENYLETHANE	632-50-8	C26H22	26	22	316	360	175	-	-	-13100	13100	-	-
n-HEXATRIACONTANE	630-06-8	C36H74	36	74	436	-	202	-	-	-22100	22100	-	-
BENZENE, 1-ETHENYL-4-(1-METHYLETHENYL)-	16262-48-9	C11H12	11	12	136	-	-	-	0.93	-	-	-	-
BENZENE, (1-METHYL-1-PROPENYL)-, (Z)	767-99-7	C10H12	10	12	124	-	-	-	0.9191	-	-	-	-
BENZENE, (1-METHYL-1-PROPENYL)-,(E)-	768-00-3	C10H12	10	12	124	-	-	-	0.9138	-	-	-	-
2,5-Norbornadiene	121-46-0	C7H8	7	8	88	90	-21	-	0.9064	-	-	-	-
BENZENE, 1-ETHYL-2,3-DIMETHYL-	933-98-2	C10H14	10	14	124	-	-	-	0.8881	-	-	-	-
1,3-Diethyl-5-methylbenzene	2050-24-0	C11H16	11	16	136	205	-	-	0.8748	-	-	-	-
CYCLOHEXENE, 1-METHYL-4-(1-METHYLETHYLIDENE)-	586-62-9	C10H16	10	16	124	-	-	-	0.8632	-	-	-	-
1,5-Hexadien-3-yne	821-08-9	C6H6	6	6	76	85	-	-	0.7851	-	-	-	-
3-Ethyl-4-methylhexane	3074-77-9	C9H20	9	20	112	140	24	-	0.742	-	-	-	-
2-Methyldecane	6975-98-0	C11H24	11	24	136	189.2	-	-	0.7368	-	-	-	-
3-Ethyloctane	5881-17-4	C10H22	10	22	124	165	-	-	0.7359	-	-	-	-
4-Ethyloctane	15869-86-0	C10H22	10	22	124	163	-	-	0.7343	-	-	-	-
1,7-Octadiene	3710-30-3	C8H14	8	14	100	117.1	-	-	0.734	-	-	-	-
3,3-DIMETHYLHEPTANE	4032-86-4	C9H20	9	20	112	137	-	-	0.7254	-	-	-	-
4-Ethyl-2-methylhexane	3074-75-7	C9H20	9	20	112	134	-	-	0.7195	-	-	-	-
3-Ethyl-2-methylpentane	609-26-7	C8H18	8	18	100	115.6	2	-	0.7193	-	-	-	-
4-Methyl-1,3-pentadiene	926-56-7	C6H10	6	10	76	76	-34	-	0.7181	-	-	-	-
2-Methyl-1, cis-3-pentadiene	1501-60-6	C6H10	6	10	76	80	-12	-	0.714	-	-	-	-
n-Pentadecylcyclopentane	4669-01-6	C20H40	20	40	244	-	-	8.3	-	-	-	-	-
n-Hexadecylcyclopentane	6812-39-1	C21H42	21	42	256	-	-	9.6	-	-	-	-	-
cis,cis-1,5-Cyclooctadiene	1552-12-1	C8H12	8	12	100	149	35	-	-	-	-	-	-
trans-2-EICOSENE		C20H40	20	40	244	-	-	-	-	-	-	-	-
n-Heptadecyl-cyclopentane	0	C22H44	22	44	268	-	-	-	-	-	-	-	-
n-Hexadecyl-cyclohexane	6812-38-0	C22H44	22	44	268	-	-	-	-	-	-	-	-
N-heptadecylcyclohexane	19781-73-8	C23H46	23	46	280	-	-	-	-	-	-	-	-
Cyclopentane, octadecyl	62016-53-9	C23H46	23	46	280	-	-	-	-	-	-	-	-
CYCLOHEXENE,1-(2-PROPENYL)	13511-13-2	C9H14	9	14	112	-	-	-	-	-	-	-	-
BENZENE, 1-ETHYL-2-(1-METHYL ETHYL)-		C11H16	11	16	136	-	-	-	-	-	-	-	-
BENZENE, 1,2-DIMETHYL-3-PROPYL-	17059-44-8	C11H16	11	16	136	-	-	-	-	-	-	-	-
BENZENE, 1,2,3-TRIETHYL-	42205-08-3	C12H18	12	18	148	-	-	-	-	-	-	-	-
NAPHTHALENE, 2,6-DIETHYL-	59919-41-4	C14H16	14	16	172	-	-	-	-	-	-	-	-
2-ETHYLBIPHENYL	1812-51-7	C14H14	14	14	172	-	-	-	-	-	-	-	-
BENZENE, 1-ETHYL-4-(2 PHENYLETHYL)-	64800-83-5	C16H18	16	18	196	-	-	-	-	-	-	-	-
1,1-Diphenylbutane	719-79-9	C16H18	16	18	196	-	-	-	0.9928	-	-	-	-
2-octyne	2809-67-8	C8H14	8	14	100	138	-	-	0.7596	-	-	-	-
3-octyne	15232-76-5	C8H14	8	14	100	135.6	-	-	0.7529	-	-	-	-
4-octyne	1942-45-6	C8H14	8	14	100	133.5	-	-	0.7509	-	-	-	-
2-Heptyne	1119-65-9	C7H12	7	12	88	-	-	-	0.744	-	-	-	-
3-Methyldecane	13151-34-3	C11H24	11	24	136	-	-	-	0.7422	-	-	-	-
trans-2,2-Dimethyl-3-hexene	690-93-7	C8H16	8	16	100	-	-	-	0.6995	-	-	-	-
4-Methyldecane	2847-72-5	C11H24	11	24	136	-	-	-	-	-	-	-	-
2,4,7-Trimethyloctane	62016-38-0	C11H24	11	24	136	-	-	-	-	-	-	-	-
2,2-Dimethylnonane	17302-14-6	C11H24	11	24	136	-	-	-	-	-	-	-	-
2-Methyl-1-decene	13151-27-4	C11H22	11	22	136	-	-	-	-	-	-	-	-
2-Methyl-1-undecene	18516-37-5	C12H24	12	24	148	-	-	-	-	-	-	-	-
2,2-Dimethyldecane	17302-37-3	C12H26	12	26	148	-	-	-	-	-	-	-	-
Nonane, 5-ethyl-4-propyl		C14H30	14	30	172	-	-	-	-	-	-	-	-
Cyclopentane, nonadecyl	0	C24H48	24	48	292	-	-	-	-	-	-	-	-
Cyclohexane, octadecyl	4445-06-1	C24H48	24	48	292	-	-	-	-	-	-	-	-
Cyclopentane, eicosyl	22331-38-0	C25H50	25	50	304	-	-	-	-	-	-	-	-
Cyclohexane, nonadecyl	22349-03-7	C25H50	25	50	304	-	-	-	-	-	-	-	-
Cyclohexane, eicosyl	4443-55-4	C26H52	26	52	316	-	-	-	-	-	-	-	-
5-Cyclohexyleicosane	4443-59-8	C26H52	26	52	316	-	-	-	-	-	-	-	-
Cycloundecane	294-41-7	C11H22	11	22	136	-	-	-	-	-	-	-	-
Cyclododecane	294-62-2	C12H24	12	24	148	-	-	-	-	-	-	-	-
5-Methyl-1-heptene	13151-04-7	C8H16	8	16	100	-	-	-	-	-	-	-	-
3-Methyl-2-heptene	3404-75-9	C8H16	8	16	100	-	-	-	-	-	-	-	-
2-Nonene	2216-38-8	C9H18	9	18	112	-	-	-	-	-	-	-	-
trans-3-Nonene	20063-92-7	C9H18	9	18	112	-	-	-	-	-	-	-	-
4-Nonene	2198-23-4	C9H18	9	18	112	-	-	-	-	-	-	-	-
3-Decene	19398-37-9	C10H20	10	20	124	-	-	-	-	-	-	-	-
4-Decene	19689-18-0	C10H20	10	20	124	-	-	-	-	-	-	-	-
5-Decene	19689-19-1	C10H20	10	20	124	-	-	-	-	-	-	-	-
2-Undecene	693-61-8	C11H22	11	22	136	-	-	-	-	-	-	-	-
3-Undecene	60669-40-1	C11H22	11	22	136	-	-	-	-	-	-	-	-
4-Undecene	693-62-9	C11H22	11	22	136	-	-	-	-	-	-	-	-
5-Undecene	764-97-6	C11H22	11	22	136	-	-	-	-	-	-	-	-
Benzene, (1-methylbutyl)	2719-52-0	C11H16	11	16	136	-	-	-	-	-	-	-	-
1-Undecyne	2243-98-3	C11H20	11	20	136	-	-	-	-	-	-	-	-
1-Dodecyne	765-03-7	C12H22	12	22	148	-	-	-	-	-	-	-	-
1,1-Diphenylpentane	1726-12-1	C17H20	17	20	208	-	-	-	-	-	-	-	-
1,1-Diphenylhexane	1530-04-7	C18H22	18	22	220	-	-	-	-	-	-	-	-
1,1-Diphenylheptane	1530-05-8	C19H24	19	24	232	-	-	-	-	-	-	-	-
1,1-Diphenyloctane	1530-06-9	C20H26	20	26	244	-	-	-	-	-	-	-	-
1,1-Diphenylnonane	1726-13-2	C21H28	21	28	256	-	-	-	-	-	-	-	-
1,1-Diphenyldecane	1530-07-0	C22H30	22	30	268	-	-	-	-	-	-	-	-
1,1-Diphenyldodecane	1603-53-8	C24H34	24	34	292	-	-	-	-	-	-	-	-
1,1-Diphenyltridecane	97392-73-9	C25H36	25	36	304	-	-	-	-	-	-	-	-
1,1-Diphenyltetradecane	55268-63-8	C26H38	26	38	316	-	-	-	-	-	-	-	-
1,1-Diphenylpentadecane	97392-70-6	C27H40	27	40	328	-	-	-	-	-	-	-	-
1,1-Diphenylhexadecane	13456-23-0	C28H42	28	42	340	-	-	-	-	-	-	-	-
TETRAPHENYLETHYLENE	632-51-9	C26H20	26	20	316	420	265	-	1.155	-13000	13000	47.5158	-
1,4-DI-tert-BUTYLBENZENE	1012-72-2	C14H22	14	22	172	237.3	88	-	0.985	-7959.7	7959.7	45.5832	-
1,2,3-Trimethylindene	4773-83-5	C12H14	12	14	148	100.5	87	-	0.9714	-6470	6470	42.4659	-
cis-STILBENE	645-49-8	C14H12	14	12	172	141	121	-	1.0143	-7143.8	7143.8	42.1277	-
PENTAETHYLBENZENE	605-01-6	C16H26	16	26	196	277	120	-	0.8971	-9181.7	9181.7	42.025	-
2,7-DIMETHYLNAPHTHALENE	582-16-1	C12H12	12	12	148	262.4	109	-	1.003	-6167.9	6167.9	41.8	-
n-HEPTADECYLBENZENE	14752-75-1	C23H40	23	40	280	402	199	-	0.8546	-13600	13600	41.5091	-
n-OCTADECYLBENZENE	4445-07-2	C24H42	24	42	292	400	207	-	0.85	-14200	14200	41.3356	-
Dotriacontane	544-85-4	C32H66	32	66	388	470	202	-	0.8124	-19600	19600	41.0388	-
trans-STILBENE	103-30-0	C14H12	14	12	172	307	145	-	0.9707	-7097.2	7097.2	40.0538	-
p-tert-BUTYLSTYRENE	1746-23-2	C12H16	12	16	148	-	79	-	0.89	-6642	6642	39.9418	-
1,2,4-TRIETHYLBENZENE	877-44-1	C12H18	12	18	148	217	80	-	0.8738	-6764	6764	39.935	-
beta-PHELLANDRENE	555-10-2	C10H16	10	16	124	177	49	-	0.852	-5810	5810	39.9203	-
gamma-TERPINENE	99-85-4	C10H16	10	16	124	183	51	-	0.849	-5810	5810	39.7798	-
m-DIVINYLBENZENE	108-57-6	C10H10	10	10	124	121	65	-	0.9294	-5300	5300	39.7244	-
1,2,4-TRIMETHYL-5-ETHYLBENZENE	17851-27-3	C11H16	11	16	136	-	-	-	0.883	-6094	6094	39.5662	-
p-tert-BUTYL ETHYLBENZENE	7364-19-4	C12H18	12	18	148	211	70	-	0.8641	-6767	6767	39.5092	-
d-LIMONENE	5989-27-5	C10H16	10	16	124	177.6	45	-	0.8411	-5815.4	5815.4	39.4462	-
alpha-PHELLANDRENE	99-83-2	C10H16	10	16	124	174.9	49	-	0.841	-5810	5810	39.4049	-
1,5,9-CYCLODODECATRIENE	4904-61-4	C12H18	12	18	148	240	71	-	0.84	-6928.8	6928.8	39.3256	-
HEXAETHYLBENZENE	604-88-6	C18H30	18	30	220	298	-	-	0.8305	-10400	10400	39.26	-
p-DIISOPROPYLBENZENE	100-18-5	C12H18	12	18	148	210	81	-	0.8568	-6770	6770	39.1928	-
alpha-TERPINENE	99-86-5	C10H16	10	16	124	174	46	-	0.8375	-5800	5800	39.1734	-
2,3-DIMETHYLOCTANE	7146-60-3	C10H22	10	22	124	164	36	-	0.7377	-6290.8	6290.8	37.4252	-
2,6-DIMETHYLOCTANE	2051-30-1	C10H22	10	22	124	158	34	-	0.7313	-6286.2	6286.2	37.0734	-
2-METHYL-1-NONENE	2980-71-4	C10H20	10	20	124	167	42	-	0.7412	-6164.6	6164.6	36.8484	-
2,5-DIMETHYLOCTANE	15869-89-3	C10H22	10	22	124	157	33	-	0.7264	-6286.6	6286.6	36.8273	-
2,4-DIMETHYLOCTANE	4032-94-4	C10H22	10	22	124	154	31	-	0.7226	-6286.8	6286.8	36.6358	-
2,7-DIMETHYLOCTANE	1072-16-8	C10H22	10	22	124	160	33	-	0.7202	-6283.4	6283.4	36.4944	-
2,5-DIMETHYL-1,5-HEXADIENE	627-58-7	C8H14	8	14	100	114	7	-	0.743	-4817	4817	35.7903	-
4-METHYLCYCLOPENTENE	1759-81-5	C6H10	6	10	76	68	-28	-	0.7634	-3552.8	3552.8	35.6869	-
3-METHYLCYCLOPENTENE	1120-62-3	C6H10	6	10	76	65	-29	-	0.7572	-3546.4	3546.4	35.3333	-
2-HEXYNE	764-35-2	C6H10	6	10	76	84.3	-11	-	0.7315	-3640	3640	35.035	-
3-HEXYNE	928-49-4	C6H10	6	10	76	81.5	-17	-	0.7231	-3640	3640	34.6327	-
1-PENTENE-4-YNE	871-28-3	C5H6	5	6	64	42	-44	-	0.738	-2930	2930	33.7866	-
1-PENTENE-3-YNE	646-05-9	C5H6	5	6	64	59	-30	-	0.7401	-2910	2910	33.6514	-
trans,trans-2,4-HEXADIENE	5194-51-4	C6H10	6	10	76	82.4	-7	-	0.7101	-3580	3580	33.4494	-
cis,trans-2,4-HEXADIENE	5194-50-3	C6H10	6	10	76	83	-7	-	0.7185	-3488	3488	32.9754	-
1-Buten-3-yne	689-97-4	C4H4	4	4	52	6	-	-	0.7094	-2362	2362	32.2231	-
3-METHYL-1-BUTYNE	598-23-2	C5H8	5	8	64	28	-52	-	0.666	-3046	3046	31.6974	-
2,3-DIMETHYL-1,3-BUTADIENE	513-81-5	C10H16	10	16	124	69	-22	-	0.7222	-3584	3584	20.8739	-
