# Supplementary material for: A multiscale graph neural network for predicting the properties of high-density cycloalkane-based diesel and jet range biofuels
Source: Royal Society of Chemistry journal article supplement (doi:10.1039/d4gc02621g), 2024-01-01
Supplement: d4gc02621g4.xlsx [file d4gc02621g4.xlsx]

## Sheet: Sheet4
#	Compound	Density/g/cm3		Boiling Point/K		Flash Point/K		Viscosity/mPa·s		VNHOC/MJ/L		Cetane Number
		Experimental value	Predicted value	Experimental value	Predicted value	Experimental value	Predicted value	Experimental value	Predicted value	Experimental value	Predicted value	Experimental value	Predicted value
1	=DISPIMG("ID_B3FD8B1448BB4BDEABE29612EB499AAD",1)	0.866	0.862496	463.15	452.312		323.4	1.62	1.62618	36.7	36.7909		45.4829
2	=DISPIMG("ID_A13EBCD9A0CE488884FB03502FB2E383",1)	0.854	0.86007		522.85		356.8	2.294	2.31271	38.12	38.1599		52.1869
3	=DISPIMG("ID_153AEB33F9904D48A6A5D86DC26DA4D3",1)	0.906	0.915592		586.45		381.1	9.923	9.93245	39.42	39.518		58.4074
4	=DISPIMG("ID_6E159BFF3F334E73A12FBA0460CE8CCC",1)	0.91	0.916225	566.65	577.36		387.3	4.774	4.80958		38.1568		47.2986
5	=DISPIMG("ID_AC4A008FB20344F496DD18D2AC9B0B7D",1)	0.943	0.955677		601.95		385.2		3.20909		37.55		43.0214
6	=DISPIMG("ID_4E83788152224CE8BCE3E10B21148A91",1)	0.87	0.886644		470.25		330	2.12	2.12892	37.16	37.2258		54.8157
7	=DISPIMG("ID_0FDA83B0771940E5B51997C9B6D568C1",1)	0.887	0.887819	500.15	517.405		336.3	3.72	3.75635	38.11	38.122		55.1248
8	=DISPIMG("ID_79A0F75398EF473F9B9ED99E671E6E13",1)	0.87	0.880649		516	365.2	371.3	6.589	6.59311	38.81	38.9096		59.7381
9	=DISPIMG("ID_450DF6048AB0454F8C705807666540E0",1)	0.858	0.86958		510.82		331.2		3.82757		38.1907		46.3016
10	=DISPIMG("ID_6FD9E36B69444AB59F065FF5911041B8",1)	0.893	0.895295		514.75		359	4.37	4.4021	38.41	38.4564		41.6823
11	=DISPIMG("ID_F531C6B9B648449C945F7E620AA77703",1)	0.959	0.97479		526.65		337.6		3.7682	40.1	40.1152		57.9644
12	=DISPIMG("ID_5EC30E8C13804205B18B2A853C4D2290",1)	0.99	0.996611		533.4		341.4		3.02621		37.4411		49.5678
13	=DISPIMG("ID_F03B02192EA342C085EB78BAC3225DA1",1)	0.96	0.968318		520		358.8		3.46304		37.2961		53.2875
14	=DISPIMG("ID_140C99F97F714BC2A729A04C00EC4B8E",1)	0.896	0.896836	463.15	457.453		329.4		4.98803		37.6636		48.7367
15	=DISPIMG("ID_D03D2E6EBA3846A7AB4E4A829956C79C",1)	0.88	0.887831		491.45	330.2	332.2		4.72694	37	37.0156		44.3916
16	=DISPIMG("ID_45F7322C85794C8595914CA5C25D351B",1)	0.903	0.904806		523.9	347.6	341.9	7.2	7.22409	38.77	38.8643		50.5274
17	=DISPIMG("ID_DF46C455CFCF448BBAEA99C2FCA43079",1)	0.876	0.888443		525.85		331.3	5.1	5.10758	36.96	37.0371		51.7695
18	=DISPIMG("ID_15F78476EA914F549FB4DDC2ABBAEFBA",1)	0.895	0.898993		515.6	367.6	360.2	5.1	5.11778	42	42.0934		54.3289
19	=DISPIMG("ID_BD1BEA6024724D9FB15C18978C2D4CE7",1)	0.902	0.911536		525.4		341.5	10.7	10.719	42	42.043		42.6587
20	=DISPIMG("ID_80418DC53581444497ACFEF6E423B61C",1)	0.91	0.925992		530.7		345		4.94954	40	40.0873		57.9032
21	=DISPIMG("ID_1AA728251FA847208D4EF64A09151091",1)	0.94	0.948419		529.8		344.4		5.25652	40	40.0913		48.7254
22	=DISPIMG("ID_44D1A503FB14484692463BC8A20E7FEA",1)	0.943	0.961311		564.5		383.9		4.02755	27	27.0444		53.1768
